# Supplementary material for: In Silico Analysis of Protein–Protein Interactions of Putative Endoplasmic Reticulum Metallopeptidase 1 in Schizosaccharomyces pombe
Source: MDPI journal article supplement (doi:10.3390/cimb46050280), 2024-05-12
Supplement: s1 [file s1]

**Table S1.** Comparison of orthologous proteins that interact with ERMP1/Ermp1 in human and *S. pombe*. Go cellular component, biological process annotation, DIOPT score, similarity, and identity percentages. Proteins highlighted in gray were selected for proteolytic propensity analysis and molecular docking.

| Human protein | GO cellular component | GO biological process                                           | Orthologs Fission Yeast | GO cellular component | GO biological process                                            | DIOPT Score | Similarity percentage | Identity percentage |
|---------------|-----------------------|-----------------------------------------------------------------|-------------------------|-----------------------|------------------------------------------------------------------|-------------|-----------------------|---------------------|
| PGRMC1        | ER, mitochondria      | Heme biosynthetic process                                       | SPAC25B8.01 (Dap1)      | ER                    | Lipid metabolic process                                          | 14          | 61                    | 44                  |
| ERCC4         | Nucleus               | DNA repair                                                      | SPCC970.01 (Rad16)      | Nucleus               | DNA repair                                                       | 13          | 54                    | 32                  |
| PRKAB1        | Cytosol, nucleus      | Signal transduction                                             | SPCC1919.03c (Amk2)     | Cytosol, nucleus      | Signaling, cell adhesion, conjugation with cellular fusion       | 13          | 55                    | 38                  |
| EMC2          | ER                    | Protein insertion into ER membrane                              | SPBC15C4.01c (Oca3)     | ER                    | Protein insertion into ER membrane                               | 12          | 47                    | 28                  |
| ATP6V0C       | Plasma membrane       | Proton transmembrane transport, endosomal lumen acidification   | SPAC1B3.14 (Vma3)       | ER, vacuole           | Transmembrane transport, proton                                  | 12          | 89                    | 76                  |
| GSK3B         | Cytosol, nucleus      | Signal transduction                                             | SPAC1687.15 (Gsk3)      | Cytosol, nucleus      | Signaling                                                        | 12          | 40                    | 22                  |
| EMC1          | ER                    | Protein insertion into ER membrane                              | SPAC25H1.07 (Emc1)      | ER                    | Protein insertion into ER membrane                               | 12          | 54                    | 34                  |
| TM9SF4        | Golgi, endosomes      | Protein localization to membrane                                | SPBC1105.08 (Emp70)     | Golgi, endosomes      | Protein localization to membrane                                 | 12          | 47                    | 36                  |
| TMEM30B       | Plasma membrane       | Lipid transport                                                 | SPBC11B10.07c (Ivn1)    | ER                    | Membrane organization, phospholipid-translocating ATPase complex | 12          | 76                    | 62                  |
| CYB5B         | ER, mitochondria      | Electron transport                                              | SPCC16A11.10c (Oca8)    | ER                    | Lipid metabolic process, electron transfer activity              | 12          | 61                    | 38                  |
| PEX12         | Peroxisome            | Peroxisome organization, ubiquitin-protein transferase activity | SPAPB17E12.03 (Pex12)   | Peroxisome            | Peroxisome organization, ubiquitin-protein transferase activity  | 11          | 40                    | 21                  |
| RAB5C         | Endosomes             | Intracellular protein transport                                 | SPAC6F6.15 (Ypt5)       | Cytosol, endosomes    | Intracellular protein transport                                  | 11          | 78                    | 68                  |
| ATP2B2        | Plasma membrane       | Calcium ion transport                                           | SPAPB2B4.04c (Pmc1)     | Vacuole               | Calcium ion transport                                            | 11          | 49                    | 34                  |

|         |                            |                                                           |                     |                            |                                                           |    |    |    |
|---------|----------------------------|-----------------------------------------------------------|---------------------|----------------------------|-----------------------------------------------------------|----|----|----|
| IER3IP1 | ER                         | Endoplasmic reticulum to Golgi vesicle-mediated transport | SPAC19A8.09 (Yos1)  | ER, Golgi                  | Endoplasmic reticulum to Golgi vesicle-mediated transport | 10 | 67 | 45 |
| WDR5    | Nucleus                    | Transcription regulation, histone binding                 | SPBC354.03 (Swd3)   | Nucleus, cytosol           | Transcription regulation, histone binding                 | 10 | 45 | 27 |
| BSCL2   | ER                         | Lipid droplet formation, Lipid metabolism                 | SPAC3A11.04 (Sei1)  | ER                         | Lipid droplet formation, Lipid metabolism                 | 10 | 34 | 24 |
| NCEH1   | Plasma membrane, ER        | Lipid catabolic process                                   | SPAC1039.03         | Cytosol, nucleus           | Lipid catabolic process                                   | 10 | 58 | 38 |
| FIS1    | Mitochondria               | Mitochondrial membrane fission                            | SPBC11G11.01 (Fis1) | Mitochondria               | Mitochondrial membrane fission                            | 10 | 62 | 29 |
| MPPE1   | Golgi, ER                  | ER-Golgi transport, GPI anchor biosynthetic process       | SPAC630.12          | ER                         | GPI anchor biosynthetic process                           | 9  | 40 | 23 |
| CCDC47  | ER                         | Protein insertion into ER membrane, chaperone             | SPBC2G5.01          | ER                         | Protein insertion into ER membrane, chaperone             | 9  | 41 | 22 |
| SLC23A2 | Plasma membrane            | Transmembrane transport                                   | SPAC1399.01c        | Vacuole, Plasma membrane   | Transmembrane transport nucleobases                       | 8  | 39 | 21 |
| SLC13A4 | Plasma membrane            | Transmembrane transport                                   | SPBC3B8.04c (Plt1)  | ER, plasma membrane        | Transmembrane transport, phosphate                        | 8  | 37 | 21 |
| SLC31A2 | Plasma membrane            | Transmembrane transport                                   | SPBC23G7.16 (Ctr6)  | Vacuole, Plasma membrane   | Transmembrane transport, copper                           | 7  | 45 | 25 |
| SPAG4   | Nucleus                    | Cell differentiation                                      | SPBC12D12.01 (Sad1) | Nucleus                    | Meiotic nuclear division                                  | 7  | 48 | 28 |
| SLC5A6  | Plasma membrane            | Transmembrane transport                                   | SPBC23G7.13c        | Plasma membrane            | Transmembrane transport, urea                             | 5  | 41 | 19 |
| SLC7A14 | Plasma membrane, lysosomes | Amino acid transport                                      | SPAP7G5.06 (Per1)   | Golgi, Plasma membrane     | Transmembrane transport, amino acid                       | 5  | 36 | 21 |
| ATP2A1  | ER                         | Calcium ion transmembrane transport                       | SPBC31E1.02c (Pmr1) | ER, Golgi, plasma membrane | Calcium ion transmembrane transport                       | 5  | 51 | 35 |

|          |                        |                                               |                      |                            |                                                         |   |    |    |
|----------|------------------------|-----------------------------------------------|----------------------|----------------------------|---------------------------------------------------------|---|----|----|
| NUP35    | Nucleus                | Nucleocytoplasmic transport                   | SPAC19E9.01c (Nup40) | Nucleus                    | Nucleocytoplasmic transport, rRNA export from nucleus   | 5 | 38 | 24 |
| TRHDE    | Plasma membrane        | Peptide catabolic process                     | SPBC1921.05 (ape2)   | Vacuole, cytosol           | Peptide catabolic process                               | 5 | 49 | 28 |
| ATP2A3   | ER                     | Calcium ion transmembrane transport           | SPBC31E1.02c (Pmr1)  | ER, Golgi, plasma membrane | Calcium ion transmembrane transport                     | 5 | 51 | 34 |
| YWHAH    | Cytosol                | Signal transduction                           | SPAC8E11.02c (Rad24) | Cytosol, nucleus           | Signaling mitosis                                       | 4 | 78 | 62 |
| SCN4A    | Plasma membrane        | Sodium ion transmembrane transport            | SPAC6F6.01 (Cch1)    | Plasma membrane            | Calcium ion import across plasma membrane               | 4 | 38 | 21 |
| ENTPD2   | Plasma membrane, ER    | Nucleoside diphosphate catabolic process      | SPCC11E10.05c (Ynd1) | ER, Golgi, plasma membrane | Nucleobase-containing small molecule metabolic process  | 4 | 40 | 26 |
| RNF185   | ER, mitochondria       | Ubiquitin-dependent protein catabolic process | SPBC17A3.10 (Pas4)   | Peroxisome, ER             | Ubiquitin-like protein transferase activity             | 4 | 48 | 31 |
| ACPT     | Plasma membrane        | Acid phosphatase activity                     | SPBC4.06             | Mitochondria               | Lipid metabolic process, phospholipid metabolic process | 4 | 33 | 23 |
| GGT7     | Plasma membrane        | Glutathione biosynthesis                      | SPAC664.09 (Ggt1)    | Vacuole, ER                | Glutathione catabolic process                           | 3 | 46 | 27 |
| AQP2     | Golgi, Plasma membrane | Water transport                               | SPAC977.17           | Plasma membrane            | Water transport                                         | 3 | 42 | 30 |
| RHCG     | Plasma membrane        | Ammonia transport                             | SPCPB1C11.01 (Amt1)  | Golgi, plasma membrane     | Ammonium transmembrane transport                        | 3 | 37 | 22 |
| SLC39A5  | Plasma membrane        | Zinc ion transmembrane transport              | SPAP8A3.03 (Zip3)    | ER                         | Zinc ion transmembrane transport                        | 2 | 48 | 28 |
| ELAVL1   | Nucleus                | 3'-UTR-mediated mRNA stabilization            | SPAC343.07 (Mug28)   | Nucleus                    | RNA binding                                             | 2 | 39 | 22 |
| ZDHHHC12 | ER, Golgi              | Protein palmitoylation                        | SPBC3H7.09 (Erf2)    | ER, Golgi                  | Protein palmitoylation                                  | 2 | 41 | 26 |
| AQP6     | Plasma membrane        | Water transport                               | SPAC977.17           | Plasma membrane            | Water transport                                         | 1 | 42 | 27 |

|          |                 |                                                                       |                     |                     |                                                          |   |    |    |
|----------|-----------------|-----------------------------------------------------------------------|---------------------|---------------------|----------------------------------------------------------|---|----|----|
| ISG15    | Cytosol         | Ubiquitin protein ligase binding                                      | SPAC1805.12c (Ubi2) | Cytosol, nucleus    | Ubiquitin protein ligase binding                         | 1 | 57 | 37 |
| CREB3L1  | Nucleus, ER     | Regulation of transcription by RNA polymerase II                      | SPBC29B5.01 (Atf1)  | Nucleus             | Regulation of DNA-templated transcription                | 1 | 32 | 20 |
| RXFP1    | Plasma membrane | Hormone-mediated signaling pathway, extracellular matrix organization | SPBC887.09c (Sog2)  | Cytosol, nucleus    | Signaling, establishment or maintenance of cell polarity | 1 | 40 | 26 |
| SLC22A23 | Plasma membrane | Transmembrane transporter activity                                    | SPAC20G8.03 (Itr2)  | Plasma membrane, ER | Transmembrane transport, inositol                        | 1 | 38 | 21 |
