# Supplementary material for: In Silico Analysis of Protein–Protein Interactions of Putative Endoplasmic Reticulum Metallopeptidase 1 in Schizosaccharomyces pombe
Source: Curr Issues Mol Biol. 2024 May 12;46(5):4609–29. doi: 10.3390/cimb46050280 (PMC11120530; doi:10.3390/cimb46050280)
Supplement: Supplementary file 1 [file cimb-46-00280-s001.zip]

Archive with 4 entries (4 files):
- Supplementary material Figures S1-S6_cimb-2916902.pdf
- Supplementary material Table S1_cimb-2916902.pdf
- Table S2.Predictions of phosphorylation sites in Netphos 3.1 of human ERMP1.xlsx
- Table S3.Predictions of phosphorylation sites in Netphos 3.1 of Ermp1 from S. pombe.xlsx
