# Supplementary material for: In Silico Analysis of Protein–Protein Interactions of Putative Endoplasmic Reticulum Metallopeptidase 1 in Schizosaccharomyces pombe
Source: Curr Issues Mol Biol. 2024 May 12;46(5):4609–29. doi: 10.3390/cimb46050280 (PMC11120530; doi:10.3390/cimb46050280)
Supplement: Supplementary file 1 [file cimb-46-00280-s001.zip › Table S2.Predictions of phosphorylation sites in Netphos 3.1 of human ERMP1.xlsx]

## Sheet: NetPhos 3.1 ERMP1 HUMAN
>ERMP1 904 amino acids
#
# netphos-3.1b prediction results
#
# Sequence # x Context Score Kinase Answer
# -------------------------------------------------------------------
# ERMP1 5 S MEWGSESAA 0.478 DNAPK .
# ERMP1 5 S MEWGSESAA 0.475 cdc2 .
# ERMP1 5 S MEWGSESAA 0.453 CKII .
# ERMP1 5 S MEWGSESAA 0.448 GSK3 .
# ERMP1 5 S MEWGSESAA 0.430 CaM-II .
# ERMP1 5 S MEWGSESAA 0.385 CKI .
# ERMP1 5 S MEWGSESAA 0.301 RSK .
# ERMP1 5 S MEWGSESAA 0.297 p38MAPK .
# ERMP1 5 S MEWGSESAA 0.257 ATM .
# ERMP1 5 S MEWGSESAA 0.235 PKG .
# ERMP1 5 S MEWGSESAA 0.179 cdk5 .
# ERMP1 5 S MEWGSESAA 0.157 PKC .
# ERMP1 5 S MEWGSESAA 0.149 PKA .
# ERMP1 5 S MEWGSESAA 0.084 PKB .
# ERMP1 5 S MEWGSESAA 0.050 unsp .
#
# ERMP1 7 S WGSESAAVR 0.458 GSK3 .
# ERMP1 7 S WGSESAAVR 0.426 CaM-II .
# ERMP1 7 S WGSESAAVR 0.409 CKII .
# ERMP1 7 S WGSESAAVR 0.389 cdc2 .
# ERMP1 7 S WGSESAAVR 0.383 DNAPK .
# ERMP1 7 S WGSESAAVR 0.369 CKI .
# ERMP1 7 S WGSESAAVR 0.326 PKG .
# ERMP1 7 S WGSESAAVR 0.315 p38MAPK .
# ERMP1 7 S WGSESAAVR 0.291 ATM .
# ERMP1 7 S WGSESAAVR 0.252 RSK .
# ERMP1 7 S WGSESAAVR 0.217 cdk5 .
# ERMP1 7 S WGSESAAVR 0.204 PKA .
# ERMP1 7 S WGSESAAVR 0.137 PKC .
# ERMP1 7 S WGSESAAVR 0.077 PKB .
# ERMP1 7 S WGSESAAVR 0.009 unsp .
#
# ERMP1 44 S VDGCSGGGR 0.508 CKI YES
# ERMP1 44 S VDGCSGGGR 0.461 GSK3 .
# ERMP1 44 S VDGCSGGGR 0.456 cdc2 .
# ERMP1 44 S VDGCSGGGR 0.429 CaM-II .
# ERMP1 44 S VDGCSGGGR 0.389 PKC .
# ERMP1 44 S VDGCSGGGR 0.353 p38MAPK .
# ERMP1 44 S VDGCSGGGR 0.346 DNAPK .
# ERMP1 44 S VDGCSGGGR 0.321 ATM .
# ERMP1 44 S VDGCSGGGR 0.316 CKII .
# ERMP1 44 S VDGCSGGGR 0.239 PKA .
# ERMP1 44 S VDGCSGGGR 0.218 RSK .
# ERMP1 44 S VDGCSGGGR 0.205 PKG .
# ERMP1 44 S VDGCSGGGR 0.153 cdk5 .
# ERMP1 44 S VDGCSGGGR 0.089 PKB .
# ERMP1 44 S VDGCSGGGR 0.010 unsp .
#
# ERMP1 53 S TRKRSPGGS 0.997 unsp YES
# ERMP1 53 S TRKRSPGGS 0.752 PKB YES
# ERMP1 53 S TRKRSPGGS 0.665 cdk5 YES
# ERMP1 53 S TRKRSPGGS 0.596 PKG YES
# ERMP1 53 S TRKRSPGGS 0.539 RSK YES
# ERMP1 53 S TRKRSPGGS 0.533 GSK3 YES
# ERMP1 53 S TRKRSPGGS 0.516 p38MAPK YES
# ERMP1 53 S TRKRSPGGS 0.491 PKA .
# ERMP1 53 S TRKRSPGGS 0.459 CaM-II .
# ERMP1 53 S TRKRSPGGS 0.430 CKI .
# ERMP1 53 S TRKRSPGGS 0.346 DNAPK .
# ERMP1 53 S TRKRSPGGS 0.337 cdc2 .
# ERMP1 53 S TRKRSPGGS 0.306 ATM .
# ERMP1 53 S TRKRSPGGS 0.186 CKII .
# ERMP1 53 S TRKRSPGGS 0.088 PKC .
#
# ERMP1 57 S SPGGSGGAS 0.972 unsp YES
# ERMP1 57 S SPGGSGGAS 0.517 GSK3 YES
# ERMP1 57 S SPGGSGGAS 0.507 PKC YES
# ERMP1 57 S SPGGSGGAS 0.435 CaM-II .
# ERMP1 57 S SPGGSGGAS 0.391 CKI .
# ERMP1 57 S SPGGSGGAS 0.351 DNAPK .
# ERMP1 57 S SPGGSGGAS 0.332 cdc2 .
# ERMP1 57 S SPGGSGGAS 0.302 ATM .
# ERMP1 57 S SPGGSGGAS 0.300 CKII .
# ERMP1 57 S SPGGSGGAS 0.296 p38MAPK .
# ERMP1 57 S SPGGSGGAS 0.287 cdk5 .
# ERMP1 57 S SPGGSGGAS 0.272 PKG .
# ERMP1 57 S SPGGSGGAS 0.259 PKB .
# ERMP1 57 S SPGGSGGAS 0.258 RSK .
# ERMP1 57 S SPGGSGGAS 0.238 PKA .
#
# ERMP1 61 S SGGASRGAG 0.837 unsp YES
# ERMP1 61 S SGGASRGAG 0.494 PKA .
# ERMP1 61 S SGGASRGAG 0.466 GSK3 .
# ERMP1 61 S SGGASRGAG 0.453 cdc2 .
# ERMP1 61 S SGGASRGAG 0.429 CaM-II .
# ERMP1 61 S SGGASRGAG 0.363 CKI .
# ERMP1 61 S SGGASRGAG 0.345 DNAPK .
# ERMP1 61 S SGGASRGAG 0.316 ATM .
# ERMP1 61 S SGGASRGAG 0.308 CKII .
# ERMP1 61 S SGGASRGAG 0.278 PKC .
# ERMP1 61 S SGGASRGAG 0.274 p38MAPK .
# ERMP1 61 S SGGASRGAG 0.233 RSK .
# ERMP1 61 S SGGASRGAG 0.218 PKG .
# ERMP1 61 S SGGASRGAG 0.210 cdk5 .
# ERMP1 61 S SGGASRGAG 0.089 PKB .
#
# ERMP1 69 S GTGLSEVRA 0.512 cdc2 YES
# ERMP1 69 S GTGLSEVRA 0.431 CaM-II .
# ERMP1 69 S GTGLSEVRA 0.422 GSK3 .
# ERMP1 69 S GTGLSEVRA 0.392 RSK .
# ERMP1 69 S GTGLSEVRA 0.370 CKI .
# ERMP1 69 S GTGLSEVRA 0.346 unsp .
# ERMP1 69 S GTGLSEVRA 0.342 DNAPK .
# ERMP1 69 S GTGLSEVRA 0.313 CKII .
# ERMP1 69 S GTGLSEVRA 0.301 p38MAPK .
# ERMP1 69 S GTGLSEVRA 0.282 PKG .
# ERMP1 69 S GTGLSEVRA 0.257 ATM .
# ERMP1 69 S GTGLSEVRA 0.195 PKA .
# ERMP1 69 S GTGLSEVRA 0.179 PKC .
# ERMP1 69 S GTGLSEVRA 0.158 cdk5 .
# ERMP1 69 S GTGLSEVRA 0.076 PKB .
#
# ERMP1 91 S LVQLSLQQL 0.758 PKA YES
# ERMP1 91 S LVQLSLQQL 0.453 CaM-II .
# ERMP1 91 S LVQLSLQQL 0.432 GSK3 .
# ERMP1 91 S LVQLSLQQL 0.413 DNAPK .
# ERMP1 91 S LVQLSLQQL 0.373 CKI .
# ERMP1 91 S LVQLSLQQL 0.349 cdc2 .
# ERMP1 91 S LVQLSLQQL 0.312 p38MAPK .
# ERMP1 91 S LVQLSLQQL 0.289 ATM .
# ERMP1 91 S LVQLSLQQL 0.287 RSK .
# ERMP1 91 S LVQLSLQQL 0.279 CKII .
# ERMP1 91 S LVQLSLQQL 0.255 PKG .
# ERMP1 91 S LVQLSLQQL 0.253 cdk5 .
# ERMP1 91 S LVQLSLQQL 0.144 unsp .
# ERMP1 91 S LVQLSLQQL 0.098 PKC .
# ERMP1 91 S LVQLSLQQL 0.081 PKB .
#
# ERMP1 121 S EHITSIGPR 0.456 GSK3 .
# ERMP1 121 S EHITSIGPR 0.454 cdc2 .
# ERMP1 121 S EHITSIGPR 0.432 CaM-II .
# ERMP1 121 S EHITSIGPR 0.399 CKI .
# ERMP1 121 S EHITSIGPR 0.369 PKA .
# ERMP1 121 S EHITSIGPR 0.367 DNAPK .
# ERMP1 121 S EHITSIGPR 0.337 CKII .
# ERMP1 121 S EHITSIGPR 0.315 p38MAPK .
# ERMP1 121 S EHITSIGPR 0.280 ATM .
# ERMP1 121 S EHITSIGPR 0.258 PKG .
# ERMP1 121 S EHITSIGPR 0.227 RSK .
# ERMP1 121 S EHITSIGPR 0.186 cdk5 .
# ERMP1 121 S EHITSIGPR 0.147 PKC .
# ERMP1 121 S EHITSIGPR 0.082 PKB .
# ERMP1 121 S EHITSIGPR 0.013 unsp .
#
# ERMP1 129 S RTTGSPENE 0.988 unsp YES
# ERMP1 129 S RTTGSPENE 0.507 p38MAPK YES
# ERMP1 129 S RTTGSPENE 0.482 GSK3 .
# ERMP1 129 S RTTGSPENE 0.450 CaM-II .
# ERMP1 129 S RTTGSPENE 0.434 DNAPK .
# ERMP1 129 S RTTGSPENE 0.424 cdc2 .
# ERMP1 129 S RTTGSPENE 0.391 PKA .
# ERMP1 129 S RTTGSPENE 0.389 cdk5 .
# ERMP1 129 S RTTGSPENE 0.378 CKI .
# ERMP1 129 S RTTGSPENE 0.344 ATM .
# ERMP1 129 S RTTGSPENE 0.338 RSK .
# ERMP1 129 S RTTGSPENE 0.312 CKII .
# ERMP1 129 S RTTGSPENE 0.268 PKG .
# ERMP1 129 S RTTGSPENE 0.087 PKB .
# ERMP1 129 S RTTGSPENE 0.053 PKC .
#
# ERMP1 151 S IEVQSNSLH 0.465 cdc2 .
# ERMP1 151 S IEVQSNSLH 0.445 GSK3 .
# ERMP1 151 S IEVQSNSLH 0.439 CaM-II .
# ERMP1 151 S IEVQSNSLH 0.438 CKII .
# ERMP1 151 S IEVQSNSLH 0.364 DNAPK .
# ERMP1 151 S IEVQSNSLH 0.362 CKI .
# ERMP1 151 S IEVQSNSLH 0.356 p38MAPK .
# ERMP1 151 S IEVQSNSLH 0.330 PKC .
# ERMP1 151 S IEVQSNSLH 0.320 RSK .
# ERMP1 151 S IEVQSNSLH 0.292 ATM .
# ERMP1 151 S IEVQSNSLH 0.245 PKG .
# ERMP1 151 S IEVQSNSLH 0.172 cdk5 .
# ERMP1 151 S IEVQSNSLH 0.138 PKA .
# ERMP1 151 S IEVQSNSLH 0.089 PKB .
# ERMP1 151 S IEVQSNSLH 0.013 unsp .
#
# ERMP1 153 S VQSNSLHKI 0.600 PKC YES
# ERMP1 153 S VQSNSLHKI 0.475 cdc2 .
# ERMP1 153 S VQSNSLHKI 0.445 GSK3 .
# ERMP1 153 S VQSNSLHKI 0.431 DNAPK .
# ERMP1 153 S VQSNSLHKI 0.416 CaM-II .
# ERMP1 153 S VQSNSLHKI 0.376 RSK .
# ERMP1 153 S VQSNSLHKI 0.375 CKI .
# ERMP1 153 S VQSNSLHKI 0.304 ATM .
# ERMP1 153 S VQSNSLHKI 0.288 CKII .
# ERMP1 153 S VQSNSLHKI 0.253 p38MAPK .
# ERMP1 153 S VQSNSLHKI 0.242 PKA .
# ERMP1 153 S VQSNSLHKI 0.231 PKG .
# ERMP1 153 S VQSNSLHKI 0.157 cdk5 .
# ERMP1 153 S VQSNSLHKI 0.123 unsp .
# ERMP1 153 S VQSNSLHKI 0.078 PKB .
#
# ERMP1 158 S LHKISVDVQ 0.689 unsp YES
# ERMP1 158 S LHKISVDVQ 0.518 PKA YES
# ERMP1 158 S LHKISVDVQ 0.460 CaM-II .
# ERMP1 158 S LHKISVDVQ 0.433 PKG .
# ERMP1 158 S LHKISVDVQ 0.430 GSK3 .
# ERMP1 158 S LHKISVDVQ 0.420 cdc2 .
# ERMP1 158 S LHKISVDVQ 0.360 CKI .
# ERMP1 158 S LHKISVDVQ 0.344 CKII .
# ERMP1 158 S LHKISVDVQ 0.340 DNAPK .
# ERMP1 158 S LHKISVDVQ 0.322 p38MAPK .
# ERMP1 158 S LHKISVDVQ 0.308 ATM .
# ERMP1 158 S LHKISVDVQ 0.304 RSK .
# ERMP1 158 S LHKISVDVQ 0.203 cdk5 .
# ERMP1 158 S LHKISVDVQ 0.094 PKC .
# ERMP1 158 S LHKISVDVQ 0.084 PKB .
#
# ERMP1 167 S RPTGSFSID 0.474 PKA .
# ERMP1 167 S RPTGSFSID 0.463 GSK3 .
# ERMP1 167 S RPTGSFSID 0.450 CaM-II .
# ERMP1 167 S RPTGSFSID 0.433 DNAPK .
# ERMP1 167 S RPTGSFSID 0.411 PKG .
# ERMP1 167 S RPTGSFSID 0.371 CKI .
# ERMP1 167 S RPTGSFSID 0.346 cdc2 .
# ERMP1 167 S RPTGSFSID 0.329 CKII .
# ERMP1 167 S RPTGSFSID 0.322 RSK .
# ERMP1 167 S RPTGSFSID 0.309 p38MAPK .
# ERMP1 167 S RPTGSFSID 0.270 ATM .
# ERMP1 167 S RPTGSFSID 0.218 PKC .
# ERMP1 167 S RPTGSFSID 0.154 cdk5 .
# ERMP1 167 S RPTGSFSID 0.096 PKB .
# ERMP1 167 S RPTGSFSID 0.012 unsp .
#
# ERMP1 169 S TGSFSIDFL 0.455 CaM-II .
# ERMP1 169 S TGSFSIDFL 0.437 GSK3 .
# ERMP1 169 S TGSFSIDFL 0.410 cdc2 .
# ERMP1 169 S TGSFSIDFL 0.406 CKI .
# ERMP1 169 S TGSFSIDFL 0.376 CKII .
# ERMP1 169 S TGSFSIDFL 0.359 DNAPK .
# ERMP1 169 S TGSFSIDFL 0.330 ATM .
# ERMP1 169 S TGSFSIDFL 0.291 PKA .
# ERMP1 169 S TGSFSIDFL 0.291 RSK .
# ERMP1 169 S TGSFSIDFL 0.289 p38MAPK .
# ERMP1 169 S TGSFSIDFL 0.277 PKG .
# ERMP1 169 S TGSFSIDFL 0.221 cdk5 .
# ERMP1 169 S TGSFSIDFL 0.177 unsp .
# ERMP1 169 S TGSFSIDFL 0.078 PKC .
# ERMP1 169 S TGSFSIDFL 0.073 PKB .
#
# ERMP1 178 S GGFTSYYDN 0.831 unsp YES
# ERMP1 178 S GGFTSYYDN 0.480 CKI .
# ERMP1 178 S GGFTSYYDN 0.443 cdc2 .
# ERMP1 178 S GGFTSYYDN 0.440 CKII .
# ERMP1 178 S GGFTSYYDN 0.426 CaM-II .
# ERMP1 178 S GGFTSYYDN 0.423 GSK3 .
# ERMP1 178 S GGFTSYYDN 0.401 DNAPK .
# ERMP1 178 S GGFTSYYDN 0.308 ATM .
# ERMP1 178 S GGFTSYYDN 0.286 RSK .
# ERMP1 178 S GGFTSYYDN 0.273 p38MAPK .
# ERMP1 178 S GGFTSYYDN 0.261 PKA .
# ERMP1 178 S GGFTSYYDN 0.253 PKG .
# ERMP1 178 S GGFTSYYDN 0.161 PKC .
# ERMP1 178 S GGFTSYYDN 0.147 cdk5 .
# ERMP1 178 S GGFTSYYDN 0.100 PKB .
#
# ERMP1 208 S CHFDSVANS 0.475 GSK3 .
# ERMP1 208 S CHFDSVANS 0.451 PKA .
# ERMP1 208 S CHFDSVANS 0.448 CaM-II .
# ERMP1 208 S CHFDSVANS 0.385 CKI .
# ERMP1 208 S CHFDSVANS 0.355 CKII .
# ERMP1 208 S CHFDSVANS 0.346 DNAPK .
# ERMP1 208 S CHFDSVANS 0.343 cdc2 .
# ERMP1 208 S CHFDSVANS 0.333 RSK .
# ERMP1 208 S CHFDSVANS 0.332 p38MAPK .
# ERMP1 208 S CHFDSVANS 0.305 ATM .
# ERMP1 208 S CHFDSVANS 0.305 PKG .
# ERMP1 208 S CHFDSVANS 0.236 PKC .
# ERMP1 208 S CHFDSVANS 0.200 cdk5 .
# ERMP1 208 S CHFDSVANS 0.094 PKB .
# ERMP1 208 S CHFDSVANS 0.050 unsp .
#
# ERMP1 212 S SVANSPGAS 0.995 unsp YES
# ERMP1 212 S SVANSPGAS 0.537 GSK3 YES
# ERMP1 212 S SVANSPGAS 0.529 cdk5 YES
# ERMP1 212 S SVANSPGAS 0.526 CKI YES
# ERMP1 212 S SVANSPGAS 0.450 p38MAPK .
# ERMP1 212 S SVANSPGAS 0.443 CaM-II .
# ERMP1 212 S SVANSPGAS 0.433 CKII .
# ERMP1 212 S SVANSPGAS 0.384 cdc2 .
# ERMP1 212 S SVANSPGAS 0.360 DNAPK .
# ERMP1 212 S SVANSPGAS 0.339 ATM .
# ERMP1 212 S SVANSPGAS 0.290 RSK .
# ERMP1 212 S SVANSPGAS 0.232 PKG .
# ERMP1 212 S SVANSPGAS 0.121 PKA .
# ERMP1 212 S SVANSPGAS 0.105 PKB .
# ERMP1 212 S SVANSPGAS 0.097 PKC .
#
# ERMP1 216 S SPGASDDAV 0.502 CKII YES
# ERMP1 216 S SPGASDDAV 0.457 CaM-II .
# ERMP1 216 S SPGASDDAV 0.445 cdc2 .
# ERMP1 216 S SPGASDDAV 0.441 GSK3 .
# ERMP1 216 S SPGASDDAV 0.379 PKA .
# ERMP1 216 S SPGASDDAV 0.362 CKI .
# ERMP1 216 S SPGASDDAV 0.346 DNAPK .
# ERMP1 216 S SPGASDDAV 0.329 ATM .
# ERMP1 216 S SPGASDDAV 0.265 p38MAPK .
# ERMP1 216 S SPGASDDAV 0.256 RSK .
# ERMP1 216 S SPGASDDAV 0.235 PKG .
# ERMP1 216 S SPGASDDAV 0.228 PKC .
# ERMP1 216 S SPGASDDAV 0.205 cdk5 .
# ERMP1 216 S SPGASDDAV 0.094 PKB .
# ERMP1 216 S SPGASDDAV 0.037 unsp .
#
# ERMP1 221 S DDAVSCSVM 0.479 CKII .
# ERMP1 221 S DDAVSCSVM 0.464 CaM-II .
# ERMP1 221 S DDAVSCSVM 0.444 GSK3 .
# ERMP1 221 S DDAVSCSVM 0.424 cdc2 .
# ERMP1 221 S DDAVSCSVM 0.397 CKI .
# ERMP1 221 S DDAVSCSVM 0.350 DNAPK .
# ERMP1 221 S DDAVSCSVM 0.330 p38MAPK .
# ERMP1 221 S DDAVSCSVM 0.311 unsp .
# ERMP1 221 S DDAVSCSVM 0.278 ATM .
# ERMP1 221 S DDAVSCSVM 0.251 RSK .
# ERMP1 221 S DDAVSCSVM 0.248 PKG .
# ERMP1 221 S DDAVSCSVM 0.216 PKA .
# ERMP1 221 S DDAVSCSVM 0.202 cdk5 .
# ERMP1 221 S DDAVSCSVM 0.153 PKC .
# ERMP1 221 S DDAVSCSVM 0.081 PKB .
#
# ERMP1 223 S AVSCSVMLE 0.525 CKII YES
# ERMP1 223 S AVSCSVMLE 0.475 cdc2 .
# ERMP1 223 S AVSCSVMLE 0.439 GSK3 .
# ERMP1 223 S AVSCSVMLE 0.424 CaM-II .
# ERMP1 223 S AVSCSVMLE 0.385 PKA .
# ERMP1 223 S AVSCSVMLE 0.363 CKI .
# ERMP1 223 S AVSCSVMLE 0.346 DNAPK .
# ERMP1 223 S AVSCSVMLE 0.339 ATM .
# ERMP1 223 S AVSCSVMLE 0.334 p38MAPK .
# ERMP1 223 S AVSCSVMLE 0.283 RSK .
# ERMP1 223 S AVSCSVMLE 0.216 PKG .
# ERMP1 223 S AVSCSVMLE 0.162 cdk5 .
# ERMP1 223 S AVSCSVMLE 0.131 PKC .
# ERMP1 223 S AVSCSVMLE 0.098 PKB .
# ERMP1 223 S AVSCSVMLE 0.015 unsp .
#
# ERMP1 233 S LRVLSTSSE 0.901 unsp YES
# ERMP1 233 S LRVLSTSSE 0.759 PKA YES
# ERMP1 233 S LRVLSTSSE 0.504 RSK YES
# ERMP1 233 S LRVLSTSSE 0.492 PKG .
# ERMP1 233 S LRVLSTSSE 0.470 CaM-II .
# ERMP1 233 S LRVLSTSSE 0.442 GSK3 .
# ERMP1 233 S LRVLSTSSE 0.416 cdc2 .
# ERMP1 233 S LRVLSTSSE 0.360 CKII .
# ERMP1 233 S LRVLSTSSE 0.360 CKI .
# ERMP1 233 S LRVLSTSSE 0.359 DNAPK .
# ERMP1 233 S LRVLSTSSE 0.294 p38MAPK .
# ERMP1 233 S LRVLSTSSE 0.270 ATM .
# ERMP1 233 S LRVLSTSSE 0.193 cdk5 .
# ERMP1 233 S LRVLSTSSE 0.136 PKB .
# ERMP1 233 S LRVLSTSSE 0.079 PKC .
#
# ERMP1 235 S VLSTSSEAL 0.982 unsp YES
# ERMP1 235 S VLSTSSEAL 0.474 GSK3 .
# ERMP1 235 S VLSTSSEAL 0.441 CaM-II .
# ERMP1 235 S VLSTSSEAL 0.440 CKII .
# ERMP1 235 S VLSTSSEAL 0.396 cdc2 .
# ERMP1 235 S VLSTSSEAL 0.389 CKI .
# ERMP1 235 S VLSTSSEAL 0.375 RSK .
# ERMP1 235 S VLSTSSEAL 0.351 DNAPK .
# ERMP1 235 S VLSTSSEAL 0.285 ATM .
# ERMP1 235 S VLSTSSEAL 0.245 p38MAPK .
# ERMP1 235 S VLSTSSEAL 0.240 PKG .
# ERMP1 235 S VLSTSSEAL 0.154 PKA .
# ERMP1 235 S VLSTSSEAL 0.149 cdk5 .
# ERMP1 235 S VLSTSSEAL 0.139 PKB .
# ERMP1 235 S VLSTSSEAL 0.137 PKC .
#
# ERMP1 236 S LSTSSEALH 0.450 CaM-II .
# ERMP1 236 S LSTSSEALH 0.436 cdc2 .
# ERMP1 236 S LSTSSEALH 0.414 GSK3 .
# ERMP1 236 S LSTSSEALH 0.409 DNAPK .
# ERMP1 236 S LSTSSEALH 0.397 CKII .
# ERMP1 236 S LSTSSEALH 0.359 PKA .
# ERMP1 236 S LSTSSEALH 0.357 CKI .
# ERMP1 236 S LSTSSEALH 0.314 p38MAPK .
# ERMP1 236 S LSTSSEALH 0.286 ATM .
# ERMP1 236 S LSTSSEALH 0.259 RSK .
# ERMP1 236 S LSTSSEALH 0.247 PKG .
# ERMP1 236 S LSTSSEALH 0.233 PKC .
# ERMP1 236 S LSTSSEALH 0.185 cdk5 .
# ERMP1 236 S LSTSSEALH 0.081 PKB .
# ERMP1 236 S LSTSSEALH 0.014 unsp .
#
# ERMP1 258 S VLQASHGFI 0.467 CaM-II .
# ERMP1 258 S VLQASHGFI 0.462 GSK3 .
# ERMP1 258 S VLQASHGFI 0.454 cdc2 .
# ERMP1 258 S VLQASHGFI 0.379 CKI .
# ERMP1 258 S VLQASHGFI 0.377 ATM .
# ERMP1 258 S VLQASHGFI 0.359 DNAPK .
# ERMP1 258 S VLQASHGFI 0.330 p38MAPK .
# ERMP1 258 S VLQASHGFI 0.317 PKA .
# ERMP1 258 S VLQASHGFI 0.311 CKII .
# ERMP1 258 S VLQASHGFI 0.311 RSK .
# ERMP1 258 S VLQASHGFI 0.273 PKC .
# ERMP1 258 S VLQASHGFI 0.227 PKG .
# ERMP1 258 S VLQASHGFI 0.176 cdk5 .
# ERMP1 258 S VLQASHGFI 0.086 PKB .
# ERMP1 258 S VLQASHGFI 0.081 unsp .
#
# ERMP1 269 S HPWASLIRA 0.668 PKC YES
# ERMP1 269 S HPWASLIRA 0.465 DNAPK .
# ERMP1 269 S HPWASLIRA 0.461 GSK3 .
# ERMP1 269 S HPWASLIRA 0.432 CaM-II .
# ERMP1 269 S HPWASLIRA 0.418 cdc2 .
# ERMP1 269 S HPWASLIRA 0.411 CKI .
# ERMP1 269 S HPWASLIRA 0.366 PKG .
# ERMP1 269 S HPWASLIRA 0.356 PKA .
# ERMP1 269 S HPWASLIRA 0.292 p38MAPK .
# ERMP1 269 S HPWASLIRA 0.286 ATM .
# ERMP1 269 S HPWASLIRA 0.282 CKII .
# ERMP1 269 S HPWASLIRA 0.261 RSK .
# ERMP1 269 S HPWASLIRA 0.178 cdk5 .
# ERMP1 269 S HPWASLIRA 0.071 PKB .
# ERMP1 269 S HPWASLIRA 0.045 unsp .
#
# ERMP1 304 S QAYVSAAKH 0.714 PKC YES
# ERMP1 304 S QAYVSAAKH 0.464 PKG .
# ERMP1 304 S QAYVSAAKH 0.448 CaM-II .
# ERMP1 304 S QAYVSAAKH 0.435 GSK3 .
# ERMP1 304 S QAYVSAAKH 0.376 cdc2 .
# ERMP1 304 S QAYVSAAKH 0.367 CKI .
# ERMP1 304 S QAYVSAAKH 0.350 DNAPK .
# ERMP1 304 S QAYVSAAKH 0.336 p38MAPK .
# ERMP1 304 S QAYVSAAKH 0.315 CKII .
# ERMP1 304 S QAYVSAAKH 0.295 RSK .
# ERMP1 304 S QAYVSAAKH 0.285 ATM .
# ERMP1 304 S QAYVSAAKH 0.253 cdk5 .
# ERMP1 304 S QAYVSAAKH 0.110 PKA .
# ERMP1 304 S QAYVSAAKH 0.094 unsp .
# ERMP1 304 S QAYVSAAKH 0.082 PKB .
#
# ERMP1 312 S HPFASVVAQ 0.532 PKC YES
# ERMP1 312 S HPFASVVAQ 0.469 unsp .
# ERMP1 312 S HPFASVVAQ 0.458 CaM-II .
# ERMP1 312 S HPFASVVAQ 0.430 GSK3 .
# ERMP1 312 S HPFASVVAQ 0.407 cdc2 .
# ERMP1 312 S HPFASVVAQ 0.386 PKA .
# ERMP1 312 S HPFASVVAQ 0.361 CKI .
# ERMP1 312 S HPFASVVAQ 0.343 DNAPK .
# ERMP1 312 S HPFASVVAQ 0.323 CKII .
# ERMP1 312 S HPFASVVAQ 0.313 ATM .
# ERMP1 312 S HPFASVVAQ 0.291 p38MAPK .
# ERMP1 312 S HPFASVVAQ 0.290 RSK .
# ERMP1 312 S HPFASVVAQ 0.245 PKG .
# ERMP1 312 S HPFASVVAQ 0.157 cdk5 .
# ERMP1 312 S HPFASVVAQ 0.082 PKB .
#
# ERMP1 321 S EVFQSGIIP 0.442 GSK3 .
# ERMP1 321 S EVFQSGIIP 0.442 CaM-II .
# ERMP1 321 S EVFQSGIIP 0.412 cdc2 .
# ERMP1 321 S EVFQSGIIP 0.401 CKII .
# ERMP1 321 S EVFQSGIIP 0.376 CKI .
# ERMP1 321 S EVFQSGIIP 0.344 DNAPK .
# ERMP1 321 S EVFQSGIIP 0.343 PKA .
# ERMP1 321 S EVFQSGIIP 0.321 ATM .
# ERMP1 321 S EVFQSGIIP 0.303 p38MAPK .
# ERMP1 321 S EVFQSGIIP 0.299 RSK .
# ERMP1 321 S EVFQSGIIP 0.288 PKG .
# ERMP1 321 S EVFQSGIIP 0.210 PKC .
# ERMP1 321 S EVFQSGIIP 0.181 cdk5 .
# ERMP1 321 S EVFQSGIIP 0.094 PKB .
# ERMP1 321 S EVFQSGIIP 0.007 unsp .
#
# ERMP1 326 S GIIPSDTDF 0.905 unsp YES
# ERMP1 326 S GIIPSDTDF 0.442 CKII .
# ERMP1 326 S GIIPSDTDF 0.433 GSK3 .
# ERMP1 326 S GIIPSDTDF 0.431 CaM-II .
# ERMP1 326 S GIIPSDTDF 0.419 PKG .
# ERMP1 326 S GIIPSDTDF 0.385 cdc2 .
# ERMP1 326 S GIIPSDTDF 0.375 DNAPK .
# ERMP1 326 S GIIPSDTDF 0.367 CKI .
# ERMP1 326 S GIIPSDTDF 0.333 ATM .
# ERMP1 326 S GIIPSDTDF 0.303 p38MAPK .
# ERMP1 326 S GIIPSDTDF 0.251 RSK .
# ERMP1 326 S GIIPSDTDF 0.218 PKA .
# ERMP1 326 S GIIPSDTDF 0.167 cdk5 .
# ERMP1 326 S GIIPSDTDF 0.156 PKC .
# ERMP1 326 S GIIPSDTDF 0.078 PKB .
#
# ERMP1 367 S ILTDSIQRA 0.483 unsp .
# ERMP1 367 S ILTDSIQRA 0.459 cdc2 .
# ERMP1 367 S ILTDSIQRA 0.452 CaM-II .
# ERMP1 367 S ILTDSIQRA 0.448 GSK3 .
# ERMP1 367 S ILTDSIQRA 0.392 PKC .
# ERMP1 367 S ILTDSIQRA 0.370 CKI .
# ERMP1 367 S ILTDSIQRA 0.369 CKII .
# ERMP1 367 S ILTDSIQRA 0.356 DNAPK .
# ERMP1 367 S ILTDSIQRA 0.307 RSK .
# ERMP1 367 S ILTDSIQRA 0.295 ATM .
# ERMP1 367 S ILTDSIQRA 0.293 p38MAPK .
# ERMP1 367 S ILTDSIQRA 0.249 PKG .
# ERMP1 367 S ILTDSIQRA 0.248 cdk5 .
# ERMP1 367 S ILTDSIQRA 0.169 PKB .
# ERMP1 367 S ILTDSIQRA 0.123 PKA .
#
# ERMP1 385 S HLATSDMLA 0.582 cdc2 YES
# ERMP1 385 S HLATSDMLA 0.483 CKII .
# ERMP1 385 S HLATSDMLA 0.449 GSK3 .
# ERMP1 385 S HLATSDMLA 0.446 CaM-II .
# ERMP1 385 S HLATSDMLA 0.407 PKA .
# ERMP1 385 S HLATSDMLA 0.363 CKI .
# ERMP1 385 S HLATSDMLA 0.343 PKG .
# ERMP1 385 S HLATSDMLA 0.341 DNAPK .
# ERMP1 385 S HLATSDMLA 0.331 RSK .
# ERMP1 385 S HLATSDMLA 0.280 ATM .
# ERMP1 385 S HLATSDMLA 0.271 unsp .
# ERMP1 385 S HLATSDMLA 0.265 p38MAPK .
# ERMP1 385 S HLATSDMLA 0.156 cdk5 .
# ERMP1 385 S HLATSDMLA 0.138 PKC .
# ERMP1 385 S HLATSDMLA 0.077 PKB .
#
# ERMP1 392 S LAAASKYRH 0.916 unsp YES
# ERMP1 392 S LAAASKYRH 0.827 PKC YES
# ERMP1 392 S LAAASKYRH 0.456 cdc2 .
# ERMP1 392 S LAAASKYRH 0.451 CaM-II .
# ERMP1 392 S LAAASKYRH 0.419 GSK3 .
# ERMP1 392 S LAAASKYRH 0.391 CKI .
# ERMP1 392 S LAAASKYRH 0.366 DNAPK .
# ERMP1 392 S LAAASKYRH 0.355 p38MAPK .
# ERMP1 392 S LAAASKYRH 0.337 CKII .
# ERMP1 392 S LAAASKYRH 0.292 ATM .
# ERMP1 392 S LAAASKYRH 0.289 PKG .
# ERMP1 392 S LAAASKYRH 0.237 RSK .
# ERMP1 392 S LAAASKYRH 0.199 cdk5 .
# ERMP1 392 S LAAASKYRH 0.144 PKA .
# ERMP1 392 S LAAASKYRH 0.088 PKB .
#
# ERMP1 414 S IAYPSRIGS 0.480 GSK3 .
# ERMP1 414 S IAYPSRIGS 0.451 PKG .
# ERMP1 414 S IAYPSRIGS 0.440 cdc2 .
# ERMP1 414 S IAYPSRIGS 0.424 CaM-II .
# ERMP1 414 S IAYPSRIGS 0.392 CKI .
# ERMP1 414 S IAYPSRIGS 0.347 PKC .
# ERMP1 414 S IAYPSRIGS 0.345 p38MAPK .
# ERMP1 414 S IAYPSRIGS 0.340 DNAPK .
# ERMP1 414 S IAYPSRIGS 0.326 CKII .
# ERMP1 414 S IAYPSRIGS 0.316 ATM .
# ERMP1 414 S IAYPSRIGS 0.230 RSK .
# ERMP1 414 S IAYPSRIGS 0.200 PKA .
# ERMP1 414 S IAYPSRIGS 0.190 cdk5 .
# ERMP1 414 S IAYPSRIGS 0.116 unsp .
# ERMP1 414 S IAYPSRIGS 0.077 PKB .
#
# ERMP1 418 S SRIGSIINY 0.822 PKA YES
# ERMP1 418 S SRIGSIINY 0.674 unsp YES
# ERMP1 418 S SRIGSIINY 0.614 PKG YES
# ERMP1 418 S SRIGSIINY 0.503 RSK YES
# ERMP1 418 S SRIGSIINY 0.473 CaM-II .
# ERMP1 418 S SRIGSIINY 0.470 GSK3 .
# ERMP1 418 S SRIGSIINY 0.381 DNAPK .
# ERMP1 418 S SRIGSIINY 0.375 ATM .
# ERMP1 418 S SRIGSIINY 0.370 CKI .
# ERMP1 418 S SRIGSIINY 0.363 cdc2 .
# ERMP1 418 S SRIGSIINY 0.298 p38MAPK .
# ERMP1 418 S SRIGSIINY 0.279 PKC .
# ERMP1 418 S SRIGSIINY 0.246 CKII .
# ERMP1 418 S SRIGSIINY 0.208 cdk5 .
# ERMP1 418 S SRIGSIINY 0.168 PKB .
#
# ERMP1 460 S ITLISWFTS 0.502 cdc2 YES
# ERMP1 460 S ITLISWFTS 0.449 GSK3 .
# ERMP1 460 S ITLISWFTS 0.441 CaM-II .
# ERMP1 460 S ITLISWFTS 0.432 PKA .
# ERMP1 460 S ITLISWFTS 0.400 CKI .
# ERMP1 460 S ITLISWFTS 0.357 p38MAPK .
# ERMP1 460 S ITLISWFTS 0.339 DNAPK .
# ERMP1 460 S ITLISWFTS 0.318 ATM .
# ERMP1 460 S ITLISWFTS 0.307 CKII .
# ERMP1 460 S ITLISWFTS 0.302 RSK .
# ERMP1 460 S ITLISWFTS 0.300 PKC .
# ERMP1 460 S ITLISWFTS 0.288 PKG .
# ERMP1 460 S ITLISWFTS 0.214 cdk5 .
# ERMP1 460 S ITLISWFTS 0.096 PKB .
# ERMP1 460 S ITLISWFTS 0.025 unsp .
#
# ERMP1 464 S SWFTSLVTV 0.525 PKA YES
# ERMP1 464 S SWFTSLVTV 0.457 CaM-II .
# ERMP1 464 S SWFTSLVTV 0.447 GSK3 .
# ERMP1 464 S SWFTSLVTV 0.439 cdc2 .
# ERMP1 464 S SWFTSLVTV 0.427 CKI .
# ERMP1 464 S SWFTSLVTV 0.359 DNAPK .
# ERMP1 464 S SWFTSLVTV 0.303 CKII .
# ERMP1 464 S SWFTSLVTV 0.270 p38MAPK .
# ERMP1 464 S SWFTSLVTV 0.259 ATM .
# ERMP1 464 S SWFTSLVTV 0.254 RSK .
# ERMP1 464 S SWFTSLVTV 0.250 PKG .
# ERMP1 464 S SWFTSLVTV 0.224 cdk5 .
# ERMP1 464 S SWFTSLVTV 0.076 PKC .
# ERMP1 464 S SWFTSLVTV 0.075 PKB .
# ERMP1 464 S SWFTSLVTV 0.004 unsp .
#
# ERMP1 476 S AVFISLIGQ 0.531 PKA YES
# ERMP1 476 S AVFISLIGQ 0.524 cdc2 YES
# ERMP1 476 S AVFISLIGQ 0.454 GSK3 .
# ERMP1 476 S AVFISLIGQ 0.429 CaM-II .
# ERMP1 476 S AVFISLIGQ 0.404 CKI .
# ERMP1 476 S AVFISLIGQ 0.348 DNAPK .
# ERMP1 476 S AVFISLIGQ 0.323 RSK .
# ERMP1 476 S AVFISLIGQ 0.307 PKG .
# ERMP1 476 S AVFISLIGQ 0.303 CKII .
# ERMP1 476 S AVFISLIGQ 0.294 ATM .
# ERMP1 476 S AVFISLIGQ 0.242 p38MAPK .
# ERMP1 476 S AVFISLIGQ 0.162 cdk5 .
# ERMP1 476 S AVFISLIGQ 0.110 PKC .
# ERMP1 476 S AVFISLIGQ 0.081 PKB .
# ERMP1 476 S AVFISLIGQ 0.046 unsp .
#
# ERMP1 481 S LIGQSLSWY 0.701 PKA YES
# ERMP1 481 S LIGQSLSWY 0.445 CaM-II .
# ERMP1 481 S LIGQSLSWY 0.443 GSK3 .
# ERMP1 481 S LIGQSLSWY 0.440 cdc2 .
# ERMP1 481 S LIGQSLSWY 0.395 DNAPK .
# ERMP1 481 S LIGQSLSWY 0.362 CKI .
# ERMP1 481 S LIGQSLSWY 0.326 PKG .
# ERMP1 481 S LIGQSLSWY 0.318 CKII .
# ERMP1 481 S LIGQSLSWY 0.316 RSK .
# ERMP1 481 S LIGQSLSWY 0.271 ATM .
# ERMP1 481 S LIGQSLSWY 0.250 p38MAPK .
# ERMP1 481 S LIGQSLSWY 0.215 PKC .
# ERMP1 481 S LIGQSLSWY 0.143 cdk5 .
# ERMP1 481 S LIGQSLSWY 0.088 PKB .
# ERMP1 481 S LIGQSLSWY 0.010 unsp .
#
# ERMP1 483 S GQSLSWYNH 0.964 unsp YES
# ERMP1 483 S GQSLSWYNH 0.510 cdc2 YES
# ERMP1 483 S GQSLSWYNH 0.433 GSK3 .
# ERMP1 483 S GQSLSWYNH 0.429 CaM-II .
# ERMP1 483 S GQSLSWYNH 0.418 CKII .
# ERMP1 483 S GQSLSWYNH 0.383 DNAPK .
# ERMP1 483 S GQSLSWYNH 0.379 CKI .
# ERMP1 483 S GQSLSWYNH 0.374 p38MAPK .
# ERMP1 483 S GQSLSWYNH 0.373 PKC .
# ERMP1 483 S GQSLSWYNH 0.344 ATM .
# ERMP1 483 S GQSLSWYNH 0.286 RSK .
# ERMP1 483 S GQSLSWYNH 0.266 PKG .
# ERMP1 483 S GQSLSWYNH 0.240 PKA .
# ERMP1 483 S GQSLSWYNH 0.155 cdk5 .
# ERMP1 483 S GQSLSWYNH 0.094 PKB .
#
# ERMP1 491 S HFYVSVCLY 0.723 PKC YES
# ERMP1 491 S HFYVSVCLY 0.463 cdc2 .
# ERMP1 491 S HFYVSVCLY 0.462 CaM-II .
# ERMP1 491 S HFYVSVCLY 0.443 GSK3 .
# ERMP1 491 S HFYVSVCLY 0.425 PKA .
# ERMP1 491 S HFYVSVCLY 0.397 CKII .
# ERMP1 491 S HFYVSVCLY 0.367 PKG .
# ERMP1 491 S HFYVSVCLY 0.363 CKI .
# ERMP1 491 S HFYVSVCLY 0.341 DNAPK .
# ERMP1 491 S HFYVSVCLY 0.294 ATM .
# ERMP1 491 S HFYVSVCLY 0.287 p38MAPK .
# ERMP1 491 S HFYVSVCLY 0.249 RSK .
# ERMP1 491 S HFYVSVCLY 0.209 cdk5 .
# ERMP1 491 S HFYVSVCLY 0.084 PKB .
# ERMP1 491 S HFYVSVCLY 0.009 unsp .
#
# ERMP1 519 S YMNASAQYL 0.459 PKA .
# ERMP1 519 S YMNASAQYL 0.455 CaM-II .
# ERMP1 519 S YMNASAQYL 0.434 GSK3 .
# ERMP1 519 S YMNASAQYL 0.382 DNAPK .
# ERMP1 519 S YMNASAQYL 0.360 CKI .
# ERMP1 519 S YMNASAQYL 0.358 cdc2 .
# ERMP1 519 S YMNASAQYL 0.357 p38MAPK .
# ERMP1 519 S YMNASAQYL 0.333 CKII .
# ERMP1 519 S YMNASAQYL 0.308 ATM .
# ERMP1 519 S YMNASAQYL 0.300 RSK .
# ERMP1 519 S YMNASAQYL 0.286 PKG .
# ERMP1 519 S YMNASAQYL 0.204 cdk5 .
# ERMP1 519 S YMNASAQYL 0.120 PKC .
# ERMP1 519 S YMNASAQYL 0.093 PKB .
# ERMP1 519 S YMNASAQYL 0.003 unsp .
#
# ERMP1 531 S FFDISLFVH 0.639 PKA YES
# ERMP1 531 S FFDISLFVH 0.461 cdc2 .
# ERMP1 531 S FFDISLFVH 0.437 GSK3 .
# ERMP1 531 S FFDISLFVH 0.421 CaM-II .
# ERMP1 531 S FFDISLFVH 0.368 CKI .
# ERMP1 531 S FFDISLFVH 0.363 DNAPK .
# ERMP1 531 S FFDISLFVH 0.347 CKII .
# ERMP1 531 S FFDISLFVH 0.326 p38MAPK .
# ERMP1 531 S FFDISLFVH 0.318 ATM .
# ERMP1 531 S FFDISLFVH 0.312 PKG .
# ERMP1 531 S FFDISLFVH 0.244 RSK .
# ERMP1 531 S FFDISLFVH 0.234 cdk5 .
# ERMP1 531 S FFDISLFVH 0.161 PKC .
# ERMP1 531 S FFDISLFVH 0.081 PKB .
# ERMP1 531 S FFDISLFVH 0.005 unsp .
#
# ERMP1 549 S QGLCSAFIS 0.444 GSK3 .
# ERMP1 549 S QGLCSAFIS 0.436 CaM-II .
# ERMP1 549 S QGLCSAFIS 0.410 cdc2 .
# ERMP1 549 S QGLCSAFIS 0.401 p38MAPK .
# ERMP1 549 S QGLCSAFIS 0.384 ATM .
# ERMP1 549 S QGLCSAFIS 0.368 CKI .
# ERMP1 549 S QGLCSAFIS 0.341 DNAPK .
# ERMP1 549 S QGLCSAFIS 0.337 PKG .
# ERMP1 549 S QGLCSAFIS 0.336 RSK .
# ERMP1 549 S QGLCSAFIS 0.323 CKII .
# ERMP1 549 S QGLCSAFIS 0.177 PKA .
# ERMP1 549 S QGLCSAFIS 0.157 cdk5 .
# ERMP1 549 S QGLCSAFIS 0.126 PKC .
# ERMP1 549 S QGLCSAFIS 0.094 PKB .
# ERMP1 549 S QGLCSAFIS 0.004 unsp .
#
# ERMP1 553 S SAFISAVWV 0.467 cdc2 .
# ERMP1 553 S SAFISAVWV 0.449 CaM-II .
# ERMP1 553 S SAFISAVWV 0.443 GSK3 .
# ERMP1 553 S SAFISAVWV 0.397 PKG .
# ERMP1 553 S SAFISAVWV 0.381 PKA .
# ERMP1 553 S SAFISAVWV 0.370 CKI .
# ERMP1 553 S SAFISAVWV 0.340 CKII .
# ERMP1 553 S SAFISAVWV 0.340 DNAPK .
# ERMP1 553 S SAFISAVWV 0.299 RSK .
# ERMP1 553 S SAFISAVWV 0.289 ATM .
# ERMP1 553 S SAFISAVWV 0.286 p38MAPK .
# ERMP1 553 S SAFISAVWV 0.223 cdk5 .
# ERMP1 553 S SAFISAVWV 0.078 PKB .
# ERMP1 553 S SAFISAVWV 0.065 PKC .
# ERMP1 553 S SAFISAVWV 0.003 unsp .
#
# ERMP1 613 S ILGRSGSEI 0.977 unsp YES
# ERMP1 613 S ILGRSGSEI 0.544 PKG YES
# ERMP1 613 S ILGRSGSEI 0.482 GSK3 .
# ERMP1 613 S ILGRSGSEI 0.456 CKII .
# ERMP1 613 S ILGRSGSEI 0.454 CaM-II .
# ERMP1 613 S ILGRSGSEI 0.438 cdc2 .
# ERMP1 613 S ILGRSGSEI 0.388 CKI .
# ERMP1 613 S ILGRSGSEI 0.362 PKA .
# ERMP1 613 S ILGRSGSEI 0.349 DNAPK .
# ERMP1 613 S ILGRSGSEI 0.332 ATM .
# ERMP1 613 S ILGRSGSEI 0.321 RSK .
# ERMP1 613 S ILGRSGSEI 0.268 p38MAPK .
# ERMP1 613 S ILGRSGSEI 0.190 cdk5 .
# ERMP1 613 S ILGRSGSEI 0.117 PKC .
# ERMP1 613 S ILGRSGSEI 0.084 PKB .
#
# ERMP1 615 S GRSGSEIPP 0.906 unsp YES
# ERMP1 615 S GRSGSEIPP 0.596 PKA YES
# ERMP1 615 S GRSGSEIPP 0.473 cdc2 .
# ERMP1 615 S GRSGSEIPP 0.465 GSK3 .
# ERMP1 615 S GRSGSEIPP 0.462 RSK .
# ERMP1 615 S GRSGSEIPP 0.449 CaM-II .
# ERMP1 615 S GRSGSEIPP 0.414 PKG .
# ERMP1 615 S GRSGSEIPP 0.376 CKI .
# ERMP1 615 S GRSGSEIPP 0.349 DNAPK .
# ERMP1 615 S GRSGSEIPP 0.300 ATM .
# ERMP1 615 S GRSGSEIPP 0.289 CKII .
# ERMP1 615 S GRSGSEIPP 0.248 p38MAPK .
# ERMP1 615 S GRSGSEIPP 0.158 cdk5 .
# ERMP1 615 S GRSGSEIPP 0.151 PKB .
# ERMP1 615 S GRSGSEIPP 0.131 PKC .
#
# ERMP1 625 S VVLASILAG 0.457 cdc2 .
# ERMP1 625 S VVLASILAG 0.439 CaM-II .
# ERMP1 625 S VVLASILAG 0.418 GSK3 .
# ERMP1 625 S VVLASILAG 0.397 CKI .
# ERMP1 625 S VVLASILAG 0.349 p38MAPK .
# ERMP1 625 S VVLASILAG 0.344 CKII .
# ERMP1 625 S VVLASILAG 0.342 DNAPK .
# ERMP1 625 S VVLASILAG 0.339 PKA .
# ERMP1 625 S VVLASILAG 0.303 ATM .
# ERMP1 625 S VVLASILAG 0.293 PKC .
# ERMP1 625 S VVLASILAG 0.276 RSK .
# ERMP1 625 S VVLASILAG 0.216 PKG .
# ERMP1 625 S VVLASILAG 0.147 cdk5 .
# ERMP1 625 S VVLASILAG 0.092 PKB .
# ERMP1 625 S VVLASILAG 0.067 unsp .
#
# ERMP1 635 S TMILSSYFI 0.489 cdc2 .
# ERMP1 635 S TMILSSYFI 0.449 CaM-II .
# ERMP1 635 S TMILSSYFI 0.446 GSK3 .
# ERMP1 635 S TMILSSYFI 0.399 DNAPK .
# ERMP1 635 S TMILSSYFI 0.376 CKII .
# ERMP1 635 S TMILSSYFI 0.359 CKI .
# ERMP1 635 S TMILSSYFI 0.353 ATM .
# ERMP1 635 S TMILSSYFI 0.348 PKG .
# ERMP1 635 S TMILSSYFI 0.329 p38MAPK .
# ERMP1 635 S TMILSSYFI 0.320 RSK .
# ERMP1 635 S TMILSSYFI 0.263 PKC .
# ERMP1 635 S TMILSSYFI 0.208 PKA .
# ERMP1 635 S TMILSSYFI 0.150 cdk5 .
# ERMP1 635 S TMILSSYFI 0.087 PKB .
# ERMP1 635 S TMILSSYFI 0.003 unsp .
#
# ERMP1 636 S MILSSYFIN 0.693 PKC YES
# ERMP1 636 S MILSSYFIN 0.427 GSK3 .
# ERMP1 636 S MILSSYFIN 0.420 CaM-II .
# ERMP1 636 S MILSSYFIN 0.392 cdc2 .
# ERMP1 636 S MILSSYFIN 0.377 PKA .
# ERMP1 636 S MILSSYFIN 0.374 CKI .
# ERMP1 636 S MILSSYFIN 0.351 DNAPK .
# ERMP1 636 S MILSSYFIN 0.350 CKII .
# ERMP1 636 S MILSSYFIN 0.313 ATM .
# ERMP1 636 S MILSSYFIN 0.310 p38MAPK .
# ERMP1 636 S MILSSYFIN 0.289 RSK .
# ERMP1 636 S MILSSYFIN 0.282 PKG .
# ERMP1 636 S MILSSYFIN 0.193 cdk5 .
# ERMP1 636 S MILSSYFIN 0.108 PKB .
# ERMP1 636 S MILSSYFIN 0.042 unsp .
#
# ERMP1 647 S YLAKSTKKT 0.996 unsp YES
# ERMP1 647 S YLAKSTKKT 0.882 PKC YES
# ERMP1 647 S YLAKSTKKT 0.455 GSK3 .
# ERMP1 647 S YLAKSTKKT 0.453 cdc2 .
# ERMP1 647 S YLAKSTKKT 0.426 CaM-II .
# ERMP1 647 S YLAKSTKKT 0.384 RSK .
# ERMP1 647 S YLAKSTKKT 0.357 CKI .
# ERMP1 647 S YLAKSTKKT 0.342 DNAPK .
# ERMP1 647 S YLAKSTKKT 0.294 PKG .
# ERMP1 647 S YLAKSTKKT 0.290 CKII .
# ERMP1 647 S YLAKSTKKT 0.262 p38MAPK .
# ERMP1 647 S YLAKSTKKT 0.258 ATM .
# ERMP1 647 S YLAKSTKKT 0.181 cdk5 .
# ERMP1 647 S YLAKSTKKT 0.112 PKA .
# ERMP1 647 S YLAKSTKKT 0.096 PKB .
#
# ERMP1 668 S LLVCSGTFF 0.496 cdc2 .
# ERMP1 668 S LLVCSGTFF 0.458 GSK3 .
# ERMP1 668 S LLVCSGTFF 0.453 CaM-II .
# ERMP1 668 S LLVCSGTFF 0.422 p38MAPK .
# ERMP1 668 S LLVCSGTFF 0.402 CKII .
# ERMP1 668 S LLVCSGTFF 0.385 CKI .
# ERMP1 668 S LLVCSGTFF 0.373 PKG .
# ERMP1 668 S LLVCSGTFF 0.352 DNAPK .
# ERMP1 668 S LLVCSGTFF 0.315 ATM .
# ERMP1 668 S LLVCSGTFF 0.312 PKA .
# ERMP1 668 S LLVCSGTFF 0.257 RSK .
# ERMP1 668 S LLVCSGTFF 0.219 cdk5 .
# ERMP1 668 S LLVCSGTFF 0.192 PKC .
# ERMP1 668 S LLVCSGTFF 0.084 PKB .
# ERMP1 668 S LLVCSGTFF 0.009 unsp .
#
# ERMP1 675 S FFPYSSNPA 0.458 CaM-II .
# ERMP1 675 S FFPYSSNPA 0.450 GSK3 .
# ERMP1 675 S FFPYSSNPA 0.423 cdc2 .
# ERMP1 675 S FFPYSSNPA 0.366 CKI .
# ERMP1 675 S FFPYSSNPA 0.359 PKG .
# ERMP1 675 S FFPYSSNPA 0.348 CKII .
# ERMP1 675 S FFPYSSNPA 0.345 DNAPK .
# ERMP1 675 S FFPYSSNPA 0.293 p38MAPK .
# ERMP1 675 S FFPYSSNPA 0.275 ATM .
# ERMP1 675 S FFPYSSNPA 0.249 RSK .
# ERMP1 675 S FFPYSSNPA 0.233 cdk5 .
# ERMP1 675 S FFPYSSNPA 0.157 PKA .
# ERMP1 675 S FFPYSSNPA 0.153 PKC .
# ERMP1 675 S FFPYSSNPA 0.080 PKB .
# ERMP1 675 S FFPYSSNPA 0.015 unsp .
#
# ERMP1 676 S FPYSSNPAN 0.538 PKC YES
# ERMP1 676 S FPYSSNPAN 0.463 GSK3 .
# ERMP1 676 S FPYSSNPAN 0.442 CaM-II .
# ERMP1 676 S FPYSSNPAN 0.415 CKI .
# ERMP1 676 S FPYSSNPAN 0.382 CKII .
# ERMP1 676 S FPYSSNPAN 0.372 cdc2 .
# ERMP1 676 S FPYSSNPAN 0.369 DNAPK .
# ERMP1 676 S FPYSSNPAN 0.328 p38MAPK .
# ERMP1 676 S FPYSSNPAN 0.327 ATM .
# ERMP1 676 S FPYSSNPAN 0.309 RSK .
# ERMP1 676 S FPYSSNPAN 0.307 cdk5 .
# ERMP1 676 S FPYSSNPAN 0.307 PKG .
# ERMP1 676 S FPYSSNPAN 0.136 PKA .
# ERMP1 676 S FPYSSNPAN 0.093 PKB .
# ERMP1 676 S FPYSSNPAN 0.025 unsp .
#
# ERMP1 707 S VKRDSGIWI 0.983 unsp YES
# ERMP1 707 S VKRDSGIWI 0.675 PKA YES
# ERMP1 707 S VKRDSGIWI 0.459 GSK3 .
# ERMP1 707 S VKRDSGIWI 0.449 RSK .
# ERMP1 707 S VKRDSGIWI 0.435 CaM-II .
# ERMP1 707 S VKRDSGIWI 0.378 cdc2 .
# ERMP1 707 S VKRDSGIWI 0.365 PKC .
# ERMP1 707 S VKRDSGIWI 0.364 CKI .
# ERMP1 707 S VKRDSGIWI 0.359 PKG .
# ERMP1 707 S VKRDSGIWI 0.344 DNAPK .
# ERMP1 707 S VKRDSGIWI 0.305 p38MAPK .
# ERMP1 707 S VKRDSGIWI 0.305 ATM .
# ERMP1 707 S VKRDSGIWI 0.284 CKII .
# ERMP1 707 S VKRDSGIWI 0.132 cdk5 .
# ERMP1 707 S VKRDSGIWI 0.084 PKB .
#
# ERMP1 720 S YTGISHITP 0.466 ATM .
# ERMP1 720 S YTGISHITP 0.459 GSK3 .
# ERMP1 720 S YTGISHITP 0.449 CaM-II .
# ERMP1 720 S YTGISHITP 0.411 cdc2 .
# ERMP1 720 S YTGISHITP 0.401 CKI .
# ERMP1 720 S YTGISHITP 0.357 PKA .
# ERMP1 720 S YTGISHITP 0.340 DNAPK .
# ERMP1 720 S YTGISHITP 0.337 CKII .
# ERMP1 720 S YTGISHITP 0.312 PKC .
# ERMP1 720 S YTGISHITP 0.300 PKG .
# ERMP1 720 S YTGISHITP 0.286 p38MAPK .
# ERMP1 720 S YTGISHITP 0.277 RSK .
# ERMP1 720 S YTGISHITP 0.189 cdk5 .
# ERMP1 720 S YTGISHITP 0.156 unsp .
# ERMP1 720 S YTGISHITP 0.091 PKB .
#
# ERMP1 732 S EINDSIRAH 0.923 unsp YES
# ERMP1 732 S EINDSIRAH 0.432 GSK3 .
# ERMP1 732 S EINDSIRAH 0.425 CaM-II .
# ERMP1 732 S EINDSIRAH 0.369 CKI .
# ERMP1 732 S EINDSIRAH 0.361 cdc2 .
# ERMP1 732 S EINDSIRAH 0.361 CKII .
# ERMP1 732 S EINDSIRAH 0.349 DNAPK .
# ERMP1 732 S EINDSIRAH 0.321 p38MAPK .
# ERMP1 732 S EINDSIRAH 0.320 ATM .
# ERMP1 732 S EINDSIRAH 0.308 PKC .
# ERMP1 732 S EINDSIRAH 0.292 RSK .
# ERMP1 732 S EINDSIRAH 0.232 PKG .
# ERMP1 732 S EINDSIRAH 0.227 PKA .
# ERMP1 732 S EINDSIRAH 0.152 cdk5 .
# ERMP1 732 S EINDSIRAH 0.084 PKB .
#
# ERMP1 768 S APEVSPRNP 0.990 unsp YES
# ERMP1 768 S APEVSPRNP 0.577 cdk5 YES
# ERMP1 768 S APEVSPRNP 0.526 GSK3 YES
# ERMP1 768 S APEVSPRNP 0.458 p38MAPK .
# ERMP1 768 S APEVSPRNP 0.452 CaM-II .
# ERMP1 768 S APEVSPRNP 0.408 cdc2 .
# ERMP1 768 S APEVSPRNP 0.385 CKI .
# ERMP1 768 S APEVSPRNP 0.370 ATM .
# ERMP1 768 S APEVSPRNP 0.344 DNAPK .
# ERMP1 768 S APEVSPRNP 0.309 PKG .
# ERMP1 768 S APEVSPRNP 0.285 RSK .
# ERMP1 768 S APEVSPRNP 0.251 CKII .
# ERMP1 768 S APEVSPRNP 0.175 PKA .
# ERMP1 768 S APEVSPRNP 0.084 PKB .
# ERMP1 768 S APEVSPRNP 0.050 PKC .
#
# ERMP1 779 S FRLISKEQT 0.960 unsp YES
# ERMP1 779 S FRLISKEQT 0.609 PKA YES
# ERMP1 779 S FRLISKEQT 0.471 RSK .
# ERMP1 779 S FRLISKEQT 0.464 CaM-II .
# ERMP1 779 S FRLISKEQT 0.439 GSK3 .
# ERMP1 779 S FRLISKEQT 0.411 PKG .
# ERMP1 779 S FRLISKEQT 0.393 CKI .
# ERMP1 779 S FRLISKEQT 0.354 cdc2 .
# ERMP1 779 S FRLISKEQT 0.344 p38MAPK .
# ERMP1 779 S FRLISKEQT 0.340 DNAPK .
# ERMP1 779 S FRLISKEQT 0.338 PKC .
# ERMP1 779 S FRLISKEQT 0.299 ATM .
# ERMP1 779 S FRLISKEQT 0.275 CKII .
# ERMP1 779 S FRLISKEQT 0.232 PKB .
# ERMP1 779 S FRLISKEQT 0.188 cdk5 .
#
# ERMP1 787 S TPWDSIKLT 0.549 unsp YES
# ERMP1 787 S TPWDSIKLT 0.441 GSK3 .
# ERMP1 787 S TPWDSIKLT 0.441 CaM-II .
# ERMP1 787 S TPWDSIKLT 0.375 PKG .
# ERMP1 787 S TPWDSIKLT 0.374 cdc2 .
# ERMP1 787 S TPWDSIKLT 0.372 CKI .
# ERMP1 787 S TPWDSIKLT 0.371 CKII .
# ERMP1 787 S TPWDSIKLT 0.354 DNAPK .
# ERMP1 787 S TPWDSIKLT 0.328 PKA .
# ERMP1 787 S TPWDSIKLT 0.297 ATM .
# ERMP1 787 S TPWDSIKLT 0.288 p38MAPK .
# ERMP1 787 S TPWDSIKLT 0.196 RSK .
# ERMP1 787 S TPWDSIKLT 0.166 PKC .
# ERMP1 787 S TPWDSIKLT 0.150 cdk5 .
# ERMP1 787 S TPWDSIKLT 0.076 PKB .
#
# ERMP1 798 S ATGPSHMSF 0.495 cdc2 .
# ERMP1 798 S ATGPSHMSF 0.456 GSK3 .
# ERMP1 798 S ATGPSHMSF 0.425 CaM-II .
# ERMP1 798 S ATGPSHMSF 0.391 PKA .
# ERMP1 798 S ATGPSHMSF 0.382 PKG .
# ERMP1 798 S ATGPSHMSF 0.378 CKI .
# ERMP1 798 S ATGPSHMSF 0.344 DNAPK .
# ERMP1 798 S ATGPSHMSF 0.322 p38MAPK .
# ERMP1 798 S ATGPSHMSF 0.307 ATM .
# ERMP1 798 S ATGPSHMSF 0.284 CKII .
# ERMP1 798 S ATGPSHMSF 0.264 cdk5 .
# ERMP1 798 S ATGPSHMSF 0.258 RSK .
# ERMP1 798 S ATGPSHMSF 0.157 PKC .
# ERMP1 798 S ATGPSHMSF 0.093 PKB .
# ERMP1 798 S ATGPSHMSF 0.064 unsp .
#
# ERMP1 801 S PSHMSFYVR 0.446 GSK3 .
# ERMP1 801 S PSHMSFYVR 0.440 cdc2 .
# ERMP1 801 S PSHMSFYVR 0.438 CaM-II .
# ERMP1 801 S PSHMSFYVR 0.373 CKI .
# ERMP1 801 S PSHMSFYVR 0.371 DNAPK .
# ERMP1 801 S PSHMSFYVR 0.361 CKII .
# ERMP1 801 S PSHMSFYVR 0.327 p38MAPK .
# ERMP1 801 S PSHMSFYVR 0.325 PKG .
# ERMP1 801 S PSHMSFYVR 0.321 ATM .
# ERMP1 801 S PSHMSFYVR 0.286 RSK .
# ERMP1 801 S PSHMSFYVR 0.205 PKA .
# ERMP1 801 S PSHMSFYVR 0.193 cdk5 .
# ERMP1 801 S PSHMSFYVR 0.159 PKC .
# ERMP1 801 S PSHMSFYVR 0.083 PKB .
# ERMP1 801 S PSHMSFYVR 0.023 unsp .
#
# ERMP1 810 S AHKGSTLSQ 0.546 PKA YES
# ERMP1 810 S AHKGSTLSQ 0.521 PKG YES
# ERMP1 810 S AHKGSTLSQ 0.488 GSK3 .
# ERMP1 810 S AHKGSTLSQ 0.436 CaM-II .
# ERMP1 810 S AHKGSTLSQ 0.418 cdc2 .
# ERMP1 810 S AHKGSTLSQ 0.412 RSK .
# ERMP1 810 S AHKGSTLSQ 0.393 CKI .
# ERMP1 810 S AHKGSTLSQ 0.343 DNAPK .
# ERMP1 810 S AHKGSTLSQ 0.330 p38MAPK .
# ERMP1 810 S AHKGSTLSQ 0.294 CKII .
# ERMP1 810 S AHKGSTLSQ 0.282 PKC .
# ERMP1 810 S AHKGSTLSQ 0.282 PKB .
# ERMP1 810 S AHKGSTLSQ 0.272 ATM .
# ERMP1 810 S AHKGSTLSQ 0.195 cdk5 .
# ERMP1 810 S AHKGSTLSQ 0.093 unsp .
#
# ERMP1 813 S GSTLSQWSL 0.628 DNAPK YES
# ERMP1 813 S GSTLSQWSL 0.514 ATM YES
# ERMP1 813 S GSTLSQWSL 0.459 CaM-II .
# ERMP1 813 S GSTLSQWSL 0.459 PKC .
# ERMP1 813 S GSTLSQWSL 0.444 cdc2 .
# ERMP1 813 S GSTLSQWSL 0.434 GSK3 .
# ERMP1 813 S GSTLSQWSL 0.433 CKI .
# ERMP1 813 S GSTLSQWSL 0.403 RSK .
# ERMP1 813 S GSTLSQWSL 0.385 p38MAPK .
# ERMP1 813 S GSTLSQWSL 0.370 PKA .
# ERMP1 813 S GSTLSQWSL 0.245 PKG .
# ERMP1 813 S GSTLSQWSL 0.245 CKII .
# ERMP1 813 S GSTLSQWSL 0.238 cdk5 .
# ERMP1 813 S GSTLSQWSL 0.090 PKB .
# ERMP1 813 S GSTLSQWSL 0.051 unsp .
#
# ERMP1 816 S LSQWSLGNG 0.810 unsp YES
# ERMP1 816 S LSQWSLGNG 0.642 PKA YES
# ERMP1 816 S LSQWSLGNG 0.577 CKI YES
# ERMP1 816 S LSQWSLGNG 0.469 CaM-II .
# ERMP1 816 S LSQWSLGNG 0.444 cdc2 .
# ERMP1 816 S LSQWSLGNG 0.438 GSK3 .
# ERMP1 816 S LSQWSLGNG 0.402 DNAPK .
# ERMP1 816 S LSQWSLGNG 0.299 p38MAPK .
# ERMP1 816 S LSQWSLGNG 0.289 CKII .
# ERMP1 816 S LSQWSLGNG 0.272 ATM .
# ERMP1 816 S LSQWSLGNG 0.252 PKG .
# ERMP1 816 S LSQWSLGNG 0.237 RSK .
# ERMP1 816 S LSQWSLGNG 0.191 cdk5 .
# ERMP1 816 S LSQWSLGNG 0.095 PKC .
# ERMP1 816 S LSQWSLGNG 0.078 PKB .
#
# ERMP1 825 S TPVTSKGGD 0.792 unsp YES
# ERMP1 825 S TPVTSKGGD 0.461 GSK3 .
# ERMP1 825 S TPVTSKGGD 0.444 CaM-II .
# ERMP1 825 S TPVTSKGGD 0.432 CKI .
# ERMP1 825 S TPVTSKGGD 0.415 cdc2 .
# ERMP1 825 S TPVTSKGGD 0.388 CKII .
# ERMP1 825 S TPVTSKGGD 0.359 PKG .
# ERMP1 825 S TPVTSKGGD 0.346 DNAPK .
# ERMP1 825 S TPVTSKGGD 0.310 p38MAPK .
# ERMP1 825 S TPVTSKGGD 0.294 ATM .
# ERMP1 825 S TPVTSKGGD 0.255 cdk5 .
# ERMP1 825 S TPVTSKGGD 0.220 RSK .
# ERMP1 825 S TPVTSKGGD 0.155 PKA .
# ERMP1 825 S TPVTSKGGD 0.092 PKC .
# ERMP1 825 S TPVTSKGGD 0.078 PKB .
#
# ERMP1 835 S FVFYSHGLQ 0.449 GSK3 .
# ERMP1 835 S FVFYSHGLQ 0.441 CaM-II .
# ERMP1 835 S FVFYSHGLQ 0.408 PKA .
# ERMP1 835 S FVFYSHGLQ 0.383 cdc2 .
# ERMP1 835 S FVFYSHGLQ 0.380 CKI .
# ERMP1 835 S FVFYSHGLQ 0.352 CKII .
# ERMP1 835 S FVFYSHGLQ 0.346 DNAPK .
# ERMP1 835 S FVFYSHGLQ 0.339 p38MAPK .
# ERMP1 835 S FVFYSHGLQ 0.304 RSK .
# ERMP1 835 S FVFYSHGLQ 0.299 PKG .
# ERMP1 835 S FVFYSHGLQ 0.296 ATM .
# ERMP1 835 S FVFYSHGLQ 0.186 cdk5 .
# ERMP1 835 S FVFYSHGLQ 0.084 PKB .
# ERMP1 835 S FVFYSHGLQ 0.080 PKC .
# ERMP1 835 S FVFYSHGLQ 0.006 unsp .
#
# ERMP1 841 S GLQASAWQF 0.465 CaM-II .
# ERMP1 841 S GLQASAWQF 0.439 GSK3 .
# ERMP1 841 S GLQASAWQF 0.378 cdc2 .
# ERMP1 841 S GLQASAWQF 0.369 CKI .
# ERMP1 841 S GLQASAWQF 0.355 DNAPK .
# ERMP1 841 S GLQASAWQF 0.319 PKG .
# ERMP1 841 S GLQASAWQF 0.316 ATM .
# ERMP1 841 S GLQASAWQF 0.299 PKA .
# ERMP1 841 S GLQASAWQF 0.286 CKII .
# ERMP1 841 S GLQASAWQF 0.274 p38MAPK .
# ERMP1 841 S GLQASAWQF 0.273 RSK .
# ERMP1 841 S GLQASAWQF 0.191 PKC .
# ERMP1 841 S GLQASAWQF 0.168 cdk5 .
# ERMP1 841 S GLQASAWQF 0.086 PKB .
# ERMP1 841 S GLQASAWQF 0.002 unsp .
#
# ERMP1 852 S EVQVSEEHP 0.994 unsp YES
# ERMP1 852 S EVQVSEEHP 0.540 CKII YES
# ERMP1 852 S EVQVSEEHP 0.458 CaM-II .
# ERMP1 852 S EVQVSEEHP 0.439 GSK3 .
# ERMP1 852 S EVQVSEEHP 0.402 CKI .
# ERMP1 852 S EVQVSEEHP 0.397 cdc2 .
# ERMP1 852 S EVQVSEEHP 0.348 ATM .
# ERMP1 852 S EVQVSEEHP 0.346 DNAPK .
# ERMP1 852 S EVQVSEEHP 0.334 p38MAPK .
# ERMP1 852 S EVQVSEEHP 0.307 RSK .
# ERMP1 852 S EVQVSEEHP 0.219 PKG .
# ERMP1 852 S EVQVSEEHP 0.167 cdk5 .
# ERMP1 852 S EVQVSEEHP 0.122 PKA .
# ERMP1 852 S EVQVSEEHP 0.091 PKB .
# ERMP1 852 S EVQVSEEHP 0.050 PKC .
#
# ERMP1 870 S AHYLSGEDK 0.996 unsp YES
# ERMP1 870 S AHYLSGEDK 0.479 GSK3 .
# ERMP1 870 S AHYLSGEDK 0.470 ATM .
# ERMP1 870 S AHYLSGEDK 0.415 CaM-II .
# ERMP1 870 S AHYLSGEDK 0.405 CKII .
# ERMP1 870 S AHYLSGEDK 0.380 CKI .
# ERMP1 870 S AHYLSGEDK 0.379 cdc2 .
# ERMP1 870 S AHYLSGEDK 0.372 RSK .
# ERMP1 870 S AHYLSGEDK 0.354 DNAPK .
# ERMP1 870 S AHYLSGEDK 0.305 PKG .
# ERMP1 870 S AHYLSGEDK 0.292 p38MAPK .
# ERMP1 870 S AHYLSGEDK 0.192 cdk5 .
# ERMP1 870 S AHYLSGEDK 0.134 PKC .
# ERMP1 870 S AHYLSGEDK 0.114 PKA .
# ERMP1 870 S AHYLSGEDK 0.086 PKB .
#
# ERMP1 876 S EDKRSPQLD 0.758 unsp YES
# ERMP1 876 S EDKRSPQLD 0.541 p38MAPK YES
# ERMP1 876 S EDKRSPQLD 0.471 GSK3 .
# ERMP1 876 S EDKRSPQLD 0.437 CKII .
# ERMP1 876 S EDKRSPQLD 0.408 cdc2 .
# ERMP1 876 S EDKRSPQLD 0.399 CaM-II .
# ERMP1 876 S EDKRSPQLD 0.356 cdk5 .
# ERMP1 876 S EDKRSPQLD 0.355 CKI .
# ERMP1 876 S EDKRSPQLD 0.346 DNAPK .
# ERMP1 876 S EDKRSPQLD 0.327 PKG .
# ERMP1 876 S EDKRSPQLD 0.305 RSK .
# ERMP1 876 S EDKRSPQLD 0.303 ATM .
# ERMP1 876 S EDKRSPQLD 0.293 PKA .
# ERMP1 876 S EDKRSPQLD 0.082 PKB .
# ERMP1 876 S EDKRSPQLD 0.038 PKC .
#
# ERMP1 893 S WTFPSAWVC 0.485 PKA .
# ERMP1 893 S WTFPSAWVC 0.449 GSK3 .
# ERMP1 893 S WTFPSAWVC 0.436 CaM-II .
# ERMP1 893 S WTFPSAWVC 0.378 cdc2 .
# ERMP1 893 S WTFPSAWVC 0.371 CKI .
# ERMP1 893 S WTFPSAWVC 0.351 PKG .
# ERMP1 893 S WTFPSAWVC 0.347 DNAPK .
# ERMP1 893 S WTFPSAWVC 0.340 CKII .
# ERMP1 893 S WTFPSAWVC 0.287 p38MAPK .
# ERMP1 893 S WTFPSAWVC 0.285 ATM .
# ERMP1 893 S WTFPSAWVC 0.265 RSK .
# ERMP1 893 S WTFPSAWVC 0.229 PKC .
# ERMP1 893 S WTFPSAWVC 0.160 cdk5 .
# ERMP1 893 S WTFPSAWVC 0.086 PKB .
# ERMP1 893 S WTFPSAWVC 0.002 unsp .
#
MEWGSESAAVRRHRVGVERREGAAAAPPPEREARAQEPLVDGCSGGGRTR # 50
KRSPGGSGGASRGAGTGLSEVRAALGLALYLIALRTLVQLSLQQLVLRGA # 100
AGHRGEFDALQARDYLEHITSIGPRTTGSPENEILTVHYLLEQIKLIEVQ # 150
SNSLHKISVDVQRPTGSFSIDFLGGFTSYYDNITNVVVKLEPRDGAQHAV # 200
LANCHFDSVANSPGASDDAVSCSVMLEVLRVLSTSSEALHHAVIFLFNGA # 250
EENVLQASHGFITQHPWASLIRAFINLEAAGVGGKELVFQTGPENPWLVQ # 300
AYVSAAKHPFASVVAQEVFQSGIIPSDTDFRIYRDFGNIPGIDLAFIENG # 350
YIYHTKYDTADRILTDSIQRAGDNILAVLKHLATSDMLAAASKYRHGNMV # 400
FFDVLGLFVIAYPSRIGSIINYMVVMGVVLYLGKKFLQPKHKTGNYKKDF # 450
LCGLGITLISWFTSLVTVLIIAVFISLIGQSLSWYNHFYVSVCLYGTATV # 500
AKIILIHTLAKRFYYMNASAQYLGEVFFDISLFVHCCFLVTLTYQGLCSA # 550
FISAVWVAFPLLTKLCVHKDFKQHGAQGKFIAFYLLGMFIPYLYALYLIW # 600
AVFEMFTPILGRSGSEIPPDVVLASILAGCTMILSSYFINFIYLAKSTKK # 650
TMLTLTLVCAITFLLVCSGTFFPYSSNPANPKPKRVFLQHMTRTFHDLEG # 700
NAVKRDSGIWINGFDYTGISHITPHIPEINDSIRAHCEENAPLCGFPWYL # 750
PVHFLIRKNWYLPAPEVSPRNPPHFRLISKEQTPWDSIKLTFEATGPSHM # 800
SFYVRAHKGSTLSQWSLGNGTPVTSKGGDYFVFYSHGLQASAWQFWIEVQ # 850
VSEEHPEGMVTVAIAAHYLSGEDKRSPQLDALKEKFPDWTFPSAWVCTYD # 900
LFVF # 950
%1 ...........................................S...... # 50
%1 ..S...S...S.......S.....................S......... # 100
%1 ............................S..................... # 150
%1 ..S....S...................S...................... # 200
%1 ...........S...S......S.........S.S............... # 250
%1 ..................S............................... # 300
%1 ...S.......S.............S........................ # 350
%1 ..................................S......S........ # 400
%1 .................S................................ # 450
%1 .........S...S...........S....S.S.......S......... # 500
%1 ..............................S................... # 550
%1 .................................................. # 600
%1 ............S.S....................S..........S... # 650
%1 .........................S........................ # 700
%1 ......S........................S.................. # 750
%1 .................S..........S.......S............. # 800
%1 .........S..S..S........S......................... # 850
%1 .S.................S.....S........................ # 900
%1 ....
