# Supplementary material for: In Silico Analysis of Protein–Protein Interactions of Putative Endoplasmic Reticulum Metallopeptidase 1 in Schizosaccharomyces pombe
Source: Curr Issues Mol Biol. 2024 May 12;46(5):4609–29. doi: 10.3390/cimb46050280 (PMC11120530; doi:10.3390/cimb46050280)
Supplement: Supplementary file 1 [file cimb-46-00280-s001.zip › Table S3.Predictions of phosphorylation sites in Netphos 3.1 of Ermp1 from S. pombe.xlsx]

## Sheet: NetPhos 3.1 Ermp1 SCHPO
>Ermp1 822 amino acids
#
# netphos-3.1b prediction results
#
# Sequence # x Context Score Kinase Answer
# -------------------------------------------------------------------
#
# Ermp1 7 S LVCASSSKC 0.611 PKC YES
# Ermp1 7 S LVCASSSKC 0.474 cdc2 .
# Ermp1 7 S LVCASSSKC 0.462 CaM-II .
# Ermp1 7 S LVCASSSKC 0.440 GSK3 .
# Ermp1 7 S LVCASSSKC 0.367 CKI .
# Ermp1 7 S LVCASSSKC 0.356 DNAPK .
# Ermp1 7 S LVCASSSKC 0.319 p38MAPK .
# Ermp1 7 S LVCASSSKC 0.309 PKG .
# Ermp1 7 S LVCASSSKC 0.300 RSK .
# Ermp1 7 S LVCASSSKC 0.287 CKII .
# Ermp1 7 S LVCASSSKC 0.265 ATM .
# Ermp1 7 S LVCASSSKC 0.217 PKA .
# Ermp1 7 S LVCASSSKC 0.216 cdk5 .
# Ermp1 7 S LVCASSSKC 0.090 PKB .
# Ermp1 7 S LVCASSSKC 0.008 unsp .
#
# Ermp1 8 S VCASSSKCK 0.876 unsp YES
# Ermp1 8 S VCASSSKCK 0.849 PKC YES
# Ermp1 8 S VCASSSKCK 0.481 cdc2 .
# Ermp1 8 S VCASSSKCK 0.454 CaM-II .
# Ermp1 8 S VCASSSKCK 0.453 GSK3 .
# Ermp1 8 S VCASSSKCK 0.407 CKI .
# Ermp1 8 S VCASSSKCK 0.346 DNAPK .
# Ermp1 8 S VCASSSKCK 0.314 p38MAPK .
# Ermp1 8 S VCASSSKCK 0.284 RSK .
# Ermp1 8 S VCASSSKCK 0.283 CKII .
# Ermp1 8 S VCASSSKCK 0.278 PKG .
# Ermp1 8 S VCASSSKCK 0.255 ATM .
# Ermp1 8 S VCASSSKCK 0.194 cdk5 .
# Ermp1 8 S VCASSSKCK 0.102 PKA .
# Ermp1 8 S VCASSSKCK 0.086 PKB .
#
# Ermp1 9 S CASSSKCKR 0.747 PKC YES
# Ermp1 9 S CASSSKCKR 0.438 cdc2 .
# Ermp1 9 S CASSSKCKR 0.431 GSK3 .
# Ermp1 9 S CASSSKCKR 0.406 CaM-II .
# Ermp1 9 S CASSSKCKR 0.366 CKI .
# Ermp1 9 S CASSSKCKR 0.354 DNAPK .
# Ermp1 9 S CASSSKCKR 0.315 CKII .
# Ermp1 9 S CASSSKCKR 0.311 PKG .
# Ermp1 9 S CASSSKCKR 0.299 RSK .
# Ermp1 9 S CASSSKCKR 0.278 PKA .
# Ermp1 9 S CASSSKCKR 0.274 ATM .
# Ermp1 9 S CASSSKCKR 0.267 p38MAPK .
# Ermp1 9 S CASSSKCKR 0.214 cdk5 .
# Ermp1 9 S CASSSKCKR 0.082 PKB .
# Ermp1 9 S CASSSKCKR 0.007 unsp .
#
# Ermp1 56 S NPQFSEANA 0.699 unsp YES
# Ermp1 56 S NPQFSEANA 0.457 CaM-II .
# Ermp1 56 S NPQFSEANA 0.454 CKII .
# Ermp1 56 S NPQFSEANA 0.448 GSK3 .
# Ermp1 56 S NPQFSEANA 0.434 CKI .
# Ermp1 56 S NPQFSEANA 0.387 cdc2 .
# Ermp1 56 S NPQFSEANA 0.354 DNAPK .
# Ermp1 56 S NPQFSEANA 0.307 PKG .
# Ermp1 56 S NPQFSEANA 0.301 RSK .
# Ermp1 56 S NPQFSEANA 0.293 ATM .
# Ermp1 56 S NPQFSEANA 0.270 p38MAPK .
# Ermp1 56 S NPQFSEANA 0.232 PKA .
# Ermp1 56 S NPQFSEANA 0.169 cdk5 .
# Ermp1 56 S NPQFSEANA 0.074 PKB .
# Ermp1 56 S NPQFSEANA 0.072 PKC .
#
# Ermp1 68 S VIHLSDDIG 0.568 CKII YES
# Ermp1 68 S VIHLSDDIG 0.456 cdc2 .
# Ermp1 68 S VIHLSDDIG 0.433 GSK3 .
# Ermp1 68 S VIHLSDDIG 0.413 CaM-II .
# Ermp1 68 S VIHLSDDIG 0.373 PKA .
# Ermp1 68 S VIHLSDDIG 0.365 CKI .
# Ermp1 68 S VIHLSDDIG 0.356 p38MAPK .
# Ermp1 68 S VIHLSDDIG 0.346 DNAPK .
# Ermp1 68 S VIHLSDDIG 0.339 PKG .
# Ermp1 68 S VIHLSDDIG 0.311 ATM .
# Ermp1 68 S VIHLSDDIG 0.271 RSK .
# Ermp1 68 S VIHLSDDIG 0.164 cdk5 .
# Ermp1 68 S VIHLSDDIG 0.089 PKB .
# Ermp1 68 S VIHLSDDIG 0.079 PKC .
# Ermp1 68 S VIHLSDDIG 0.004 unsp .
#
# Ermp1 113 S QMEVSLESG 0.811 unsp YES
# Ermp1 113 S QMEVSLESG 0.461 CKI .
# Ermp1 113 S QMEVSLESG 0.451 GSK3 .
# Ermp1 113 S QMEVSLESG 0.427 CaM-II .
# Ermp1 113 S QMEVSLESG 0.421 DNAPK .
# Ermp1 113 S QMEVSLESG 0.419 cdc2 .
# Ermp1 113 S QMEVSLESG 0.347 CKII .
# Ermp1 113 S QMEVSLESG 0.293 ATM .
# Ermp1 113 S QMEVSLESG 0.259 PKG .
# Ermp1 113 S QMEVSLESG 0.248 RSK .
# Ermp1 113 S QMEVSLESG 0.245 p38MAPK .
# Ermp1 113 S QMEVSLESG 0.224 PKA .
# Ermp1 113 S QMEVSLESG 0.152 cdk5 .
# Ermp1 113 S QMEVSLESG 0.087 PKB .
# Ermp1 113 S QMEVSLESG 0.060 PKC .
#
# Ermp1 116 S VSLESGDGA 0.600 unsp YES
# Ermp1 116 S VSLESGDGA 0.593 CKI YES
# Ermp1 116 S VSLESGDGA 0.477 CKII .
# Ermp1 116 S VSLESGDGA 0.475 CaM-II .
# Ermp1 116 S VSLESGDGA 0.451 GSK3 .
# Ermp1 116 S VSLESGDGA 0.414 cdc2 .
# Ermp1 116 S VSLESGDGA 0.369 p38MAPK .
# Ermp1 116 S VSLESGDGA 0.350 DNAPK .
# Ermp1 116 S VSLESGDGA 0.335 PKC .
# Ermp1 116 S VSLESGDGA 0.297 RSK .
# Ermp1 116 S VSLESGDGA 0.271 ATM .
# Ermp1 116 S VSLESGDGA 0.212 PKG .
# Ermp1 116 S VSLESGDGA 0.153 cdk5 .
# Ermp1 116 S VSLESGDGA 0.135 PKA .
# Ermp1 116 S VSLESGDGA 0.082 PKB .
#
# Ermp1 145 S VVRLSNGTE 0.952 unsp YES
# Ermp1 145 S VVRLSNGTE 0.697 PKA YES
# Ermp1 145 S VVRLSNGTE 0.450 GSK3 .
# Ermp1 145 S VVRLSNGTE 0.449 CaM-II .
# Ermp1 145 S VVRLSNGTE 0.390 CKI .
# Ermp1 145 S VVRLSNGTE 0.379 CKII .
# Ermp1 145 S VVRLSNGTE 0.371 RSK .
# Ermp1 145 S VVRLSNGTE 0.362 DNAPK .
# Ermp1 145 S VVRLSNGTE 0.350 cdc2 .
# Ermp1 145 S VVRLSNGTE 0.334 p38MAPK .
# Ermp1 145 S VVRLSNGTE 0.313 PKG .
# Ermp1 145 S VVRLSNGTE 0.304 ATM .
# Ermp1 145 S VVRLSNGTE 0.160 cdk5 .
# Ermp1 145 S VVRLSNGTE 0.097 PKC .
# Ermp1 145 S VVRLSNGTE 0.088 PKB .
#
# Ermp1 164 S AHVDSTLPS 0.494 GSK3 .
# Ermp1 164 S AHVDSTLPS 0.444 PKG .
# Ermp1 164 S AHVDSTLPS 0.426 CaM-II .
# Ermp1 164 S AHVDSTLPS 0.390 cdc2 .
# Ermp1 164 S AHVDSTLPS 0.367 CKII .
# Ermp1 164 S AHVDSTLPS 0.364 CKI .
# Ermp1 164 S AHVDSTLPS 0.341 DNAPK .
# Ermp1 164 S AHVDSTLPS 0.311 p38MAPK .
# Ermp1 164 S AHVDSTLPS 0.282 RSK .
# Ermp1 164 S AHVDSTLPS 0.281 ATM .
# Ermp1 164 S AHVDSTLPS 0.254 PKA .
# Ermp1 164 S AHVDSTLPS 0.194 cdk5 .
# Ermp1 164 S AHVDSTLPS 0.118 PKC .
# Ermp1 164 S AHVDSTLPS 0.094 PKB .
# Ermp1 164 S AHVDSTLPS 0.068 unsp .
#
# Ermp1 168 S STLPSPGAT 0.992 unsp YES
# Ermp1 168 S STLPSPGAT 0.561 cdk5 YES
# Ermp1 168 S STLPSPGAT 0.532 GSK3 YES
# Ermp1 168 S STLPSPGAT 0.497 CKI .
# Ermp1 168 S STLPSPGAT 0.470 p38MAPK .
# Ermp1 168 S STLPSPGAT 0.434 CaM-II .
# Ermp1 168 S STLPSPGAT 0.344 cdc2 .
# Ermp1 168 S STLPSPGAT 0.343 DNAPK .
# Ermp1 168 S STLPSPGAT 0.312 CKII .
# Ermp1 168 S STLPSPGAT 0.293 ATM .
# Ermp1 168 S STLPSPGAT 0.271 RSK .
# Ermp1 168 S STLPSPGAT 0.253 PKG .
# Ermp1 168 S STLPSPGAT 0.157 PKA .
# Ermp1 168 S STLPSPGAT 0.128 PKC .
# Ermp1 168 S STLPSPGAT 0.101 PKB .
#
# Ermp1 190 S RIFISRPVP 0.604 PKA YES
# Ermp1 190 S RIFISRPVP 0.521 cdc2 YES
# Ermp1 190 S RIFISRPVP 0.467 GSK3 .
# Ermp1 190 S RIFISRPVP 0.438 CaM-II .
# Ermp1 190 S RIFISRPVP 0.367 CKI .
# Ermp1 190 S RIFISRPVP 0.343 DNAPK .
# Ermp1 190 S RIFISRPVP 0.313 ATM .
# Ermp1 190 S RIFISRPVP 0.312 PKG .
# Ermp1 190 S RIFISRPVP 0.305 p38MAPK .
# Ermp1 190 S RIFISRPVP 0.280 CKII .
# Ermp1 190 S RIFISRPVP 0.250 RSK .
# Ermp1 190 S RIFISRPVP 0.239 PKC .
# Ermp1 190 S RIFISRPVP 0.216 cdk5 .
# Ermp1 190 S RIFISRPVP 0.092 PKB .
# Ermp1 190 S RIFISRPVP 0.009 unsp .
#
# Ermp1 198 S PLTHSIVFL 0.464 CaM-II .
# Ermp1 198 S PLTHSIVFL 0.443 GSK3 .
# Ermp1 198 S PLTHSIVFL 0.413 cdc2 .
# Ermp1 198 S PLTHSIVFL 0.382 PKA .
# Ermp1 198 S PLTHSIVFL 0.363 DNAPK .
# Ermp1 198 S PLTHSIVFL 0.360 CKI .
# Ermp1 198 S PLTHSIVFL 0.307 p38MAPK .
# Ermp1 198 S PLTHSIVFL 0.305 RSK .
# Ermp1 198 S PLTHSIVFL 0.295 ATM .
# Ermp1 198 S PLTHSIVFL 0.280 PKG .
# Ermp1 198 S PLTHSIVFL 0.280 CKII .
# Ermp1 198 S PLTHSIVFL 0.229 cdk5 .
# Ermp1 198 S PLTHSIVFL 0.085 PKB .
# Ermp1 198 S PLTHSIVFL 0.069 PKC .
# Ermp1 198 S PLTHSIVFL 0.021 unsp .
#
# Ermp1 209 S DAEESLQDA 0.847 unsp YES
# Ermp1 209 S DAEESLQDA 0.523 CKII YES
# Ermp1 209 S DAEESLQDA 0.474 DNAPK .
# Ermp1 209 S DAEESLQDA 0.441 GSK3 .
# Ermp1 209 S DAEESLQDA 0.435 cdc2 .
# Ermp1 209 S DAEESLQDA 0.432 CKI .
# Ermp1 209 S DAEESLQDA 0.422 CaM-II .
# Ermp1 209 S DAEESLQDA 0.308 RSK .
# Ermp1 209 S DAEESLQDA 0.277 p38MAPK .
# Ermp1 209 S DAEESLQDA 0.269 ATM .
# Ermp1 209 S DAEESLQDA 0.236 PKG .
# Ermp1 209 S DAEESLQDA 0.182 cdk5 .
# Ermp1 209 S DAEESLQDA 0.156 PKA .
# Ermp1 209 S DAEESLQDA 0.106 PKC .
# Ermp1 209 S DAEESLQDA 0.078 PKB .
#
# Ermp1 214 S LQDASHMFI 0.559 cdc2 YES
# Ermp1 214 S LQDASHMFI 0.451 CaM-II .
# Ermp1 214 S LQDASHMFI 0.431 GSK3 .
# Ermp1 214 S LQDASHMFI 0.398 ATM .
# Ermp1 214 S LQDASHMFI 0.377 DNAPK .
# Ermp1 214 S LQDASHMFI 0.373 p38MAPK .
# Ermp1 214 S LQDASHMFI 0.372 PKA .
# Ermp1 214 S LQDASHMFI 0.360 CKI .
# Ermp1 214 S LQDASHMFI 0.349 CKII .
# Ermp1 214 S LQDASHMFI 0.278 RSK .
# Ermp1 214 S LQDASHMFI 0.229 PKG .
# Ermp1 214 S LQDASHMFI 0.178 PKC .
# Ermp1 214 S LQDASHMFI 0.163 cdk5 .
# Ermp1 214 S LQDASHMFI 0.119 unsp .
# Ermp1 214 S LQDASHMFI 0.080 PKB .
#
# Ermp1 221 S FITQSPLRD 0.567 cdk5 YES
# Ermp1 221 S FITQSPLRD 0.480 p38MAPK .
# Ermp1 221 S FITQSPLRD 0.463 GSK3 .
# Ermp1 221 S FITQSPLRD 0.436 CaM-II .
# Ermp1 221 S FITQSPLRD 0.395 cdc2 .
# Ermp1 221 S FITQSPLRD 0.358 CKI .
# Ermp1 221 S FITQSPLRD 0.350 DNAPK .
# Ermp1 221 S FITQSPLRD 0.332 CKII .
# Ermp1 221 S FITQSPLRD 0.313 RSK .
# Ermp1 221 S FITQSPLRD 0.298 PKC .
# Ermp1 221 S FITQSPLRD 0.287 ATM .
# Ermp1 221 S FITQSPLRD 0.204 PKA .
# Ermp1 221 S FITQSPLRD 0.200 PKG .
# Ermp1 221 S FITQSPLRD 0.160 unsp .
# Ermp1 221 S FITQSPLRD 0.079 PKB .
#
# Ermp1 241 S GTTGSEILF 0.525 PKC YES
# Ermp1 241 S GTTGSEILF 0.509 cdc2 YES
# Ermp1 241 S GTTGSEILF 0.429 GSK3 .
# Ermp1 241 S GTTGSEILF 0.423 CaM-II .
# Ermp1 241 S GTTGSEILF 0.373 CKI .
# Ermp1 241 S GTTGSEILF 0.360 CKII .
# Ermp1 241 S GTTGSEILF 0.357 DNAPK .
# Ermp1 241 S GTTGSEILF 0.351 p38MAPK .
# Ermp1 241 S GTTGSEILF 0.344 PKA .
# Ermp1 241 S GTTGSEILF 0.308 PKG .
# Ermp1 241 S GTTGSEILF 0.302 RSK .
# Ermp1 241 S GTTGSEILF 0.286 ATM .
# Ermp1 241 S GTTGSEILF 0.191 cdk5 .
# Ermp1 241 S GTTGSEILF 0.080 PKB .
# Ermp1 241 S GTTGSEILF 0.003 unsp .
#
# Ermp1 249 S FQATSNEMI 0.564 cdc2 YES
# Ermp1 249 S FQATSNEMI 0.465 CaM-II .
# Ermp1 249 S FQATSNEMI 0.462 GSK3 .
# Ermp1 249 S FQATSNEMI 0.397 unsp .
# Ermp1 249 S FQATSNEMI 0.374 CKI .
# Ermp1 249 S FQATSNEMI 0.351 DNAPK .
# Ermp1 249 S FQATSNEMI 0.337 CKII .
# Ermp1 249 S FQATSNEMI 0.325 RSK .
# Ermp1 249 S FQATSNEMI 0.315 ATM .
# Ermp1 249 S FQATSNEMI 0.282 p38MAPK .
# Ermp1 249 S FQATSNEMI 0.241 PKG .
# Ermp1 249 S FQATSNEMI 0.226 PKC .
# Ermp1 249 S FQATSNEMI 0.173 cdk5 .
# Ermp1 249 S FQATSNEMI 0.101 PKA .
# Ermp1 249 S FQATSNEMI 0.082 PKB .
#
# Ermp1 257 S IKAYSHVPH 0.885 unsp YES
# Ermp1 257 S IKAYSHVPH 0.554 PKC YES
# Ermp1 257 S IKAYSHVPH 0.521 cdc2 YES
# Ermp1 257 S IKAYSHVPH 0.457 CaM-II .
# Ermp1 257 S IKAYSHVPH 0.455 GSK3 .
# Ermp1 257 S IKAYSHVPH 0.365 CKI .
# Ermp1 257 S IKAYSHVPH 0.355 CKII .
# Ermp1 257 S IKAYSHVPH 0.343 DNAPK .
# Ermp1 257 S IKAYSHVPH 0.299 PKG .
# Ermp1 257 S IKAYSHVPH 0.290 p38MAPK .
# Ermp1 257 S IKAYSHVPH 0.259 ATM .
# Ermp1 257 S IKAYSHVPH 0.241 RSK .
# Ermp1 257 S IKAYSHVPH 0.201 cdk5 .
# Ermp1 257 S IKAYSHVPH 0.192 PKA .
# Ermp1 257 S IKAYSHVPH 0.094 PKB .
#
# Ermp1 279 S GLILSDTDF 0.974 unsp YES
# Ermp1 279 S GLILSDTDF 0.443 CKII .
# Ermp1 279 S GLILSDTDF 0.441 CaM-II .
# Ermp1 279 S GLILSDTDF 0.429 GSK3 .
# Ermp1 279 S GLILSDTDF 0.418 cdc2 .
# Ermp1 279 S GLILSDTDF 0.401 CKI .
# Ermp1 279 S GLILSDTDF 0.376 DNAPK .
# Ermp1 279 S GLILSDTDF 0.375 PKG .
# Ermp1 279 S GLILSDTDF 0.352 p38MAPK .
# Ermp1 279 S GLILSDTDF 0.343 ATM .
# Ermp1 279 S GLILSDTDF 0.322 RSK .
# Ermp1 279 S GLILSDTDF 0.274 PKA .
# Ermp1 279 S GLILSDTDF 0.200 cdk5 .
# Ermp1 279 S GLILSDTDF 0.154 PKC .
# Ermp1 279 S GLILSDTDF 0.079 PKB .
#
# Ermp1 303 S VVKNSYLYH 0.689 PKC YES
# Ermp1 303 S VVKNSYLYH 0.471 cdc2 .
# Ermp1 303 S VVKNSYLYH 0.436 PKA .
# Ermp1 303 S VVKNSYLYH 0.432 CaM-II .
# Ermp1 303 S VVKNSYLYH 0.426 GSK3 .
# Ermp1 303 S VVKNSYLYH 0.371 CKI .
# Ermp1 303 S VVKNSYLYH 0.370 PKG .
# Ermp1 303 S VVKNSYLYH 0.359 DNAPK .
# Ermp1 303 S VVKNSYLYH 0.351 RSK .
# Ermp1 303 S VVKNSYLYH 0.347 CKII .
# Ermp1 303 S VVKNSYLYH 0.300 p38MAPK .
# Ermp1 303 S VVKNSYLYH 0.274 ATM .
# Ermp1 303 S VVKNSYLYH 0.140 cdk5 .
# Ermp1 303 S VVKNSYLYH 0.086 PKB .
# Ermp1 303 S VVKNSYLYH 0.075 unsp .
#
# Ermp1 317 S APYISPGTP 0.550 cdk5 YES
# Ermp1 317 S APYISPGTP 0.524 GSK3 YES
# Ermp1 317 S APYISPGTP 0.502 p38MAPK YES
# Ermp1 317 S APYISPGTP 0.491 CKI .
# Ermp1 317 S APYISPGTP 0.440 CaM-II .
# Ermp1 317 S APYISPGTP 0.401 cdc2 .
# Ermp1 317 S APYISPGTP 0.343 DNAPK .
# Ermp1 317 S APYISPGTP 0.332 ATM .
# Ermp1 317 S APYISPGTP 0.281 PKG .
# Ermp1 317 S APYISPGTP 0.281 CKII .
# Ermp1 317 S APYISPGTP 0.269 RSK .
# Ermp1 317 S APYISPGTP 0.158 PKA .
# Ermp1 317 S APYISPGTP 0.084 PKB .
# Ermp1 317 S APYISPGTP 0.046 unsp .
# Ermp1 317 S APYISPGTP 0.041 PKC .
#
# Ermp1 337 S TYLVSPEAD 0.483 GSK3 .
# Ermp1 337 S TYLVSPEAD 0.475 p38MAPK .
# Ermp1 337 S TYLVSPEAD 0.446 CaM-II .
# Ermp1 337 S TYLVSPEAD 0.419 unsp .
# Ermp1 337 S TYLVSPEAD 0.378 cdc2 .
# Ermp1 337 S TYLVSPEAD 0.374 CKI .
# Ermp1 337 S TYLVSPEAD 0.370 cdk5 .
# Ermp1 337 S TYLVSPEAD 0.343 CKII .
# Ermp1 337 S TYLVSPEAD 0.343 DNAPK .
# Ermp1 337 S TYLVSPEAD 0.337 ATM .
# Ermp1 337 S TYLVSPEAD 0.293 RSK .
# Ermp1 337 S TYLVSPEAD 0.203 PKG .
# Ermp1 337 S TYLVSPEAD 0.099 PKA .
# Ermp1 337 S TYLVSPEAD 0.085 PKB .
# Ermp1 337 S TYLVSPEAD 0.070 PKC .
#
# Ermp1 347 S NNMKSSGTV 0.453 GSK3 .
# Ermp1 347 S NNMKSSGTV 0.452 CaM-II .
# Ermp1 347 S NNMKSSGTV 0.442 cdc2 .
# Ermp1 347 S NNMKSSGTV 0.428 CKI .
# Ermp1 347 S NNMKSSGTV 0.343 DNAPK .
# Ermp1 347 S NNMKSSGTV 0.333 PKG .
# Ermp1 347 S NNMKSSGTV 0.328 CKII .
# Ermp1 347 S NNMKSSGTV 0.321 PKA .
# Ermp1 347 S NNMKSSGTV 0.293 RSK .
# Ermp1 347 S NNMKSSGTV 0.275 ATM .
# Ermp1 347 S NNMKSSGTV 0.272 p38MAPK .
# Ermp1 347 S NNMKSSGTV 0.158 cdk5 .
# Ermp1 347 S NNMKSSGTV 0.082 PKB .
# Ermp1 347 S NNMKSSGTV 0.080 PKC .
# Ermp1 347 S NNMKSSGTV 0.007 unsp .
#
# Ermp1 348 S NMKSSGTVY 0.610 PKA YES
# Ermp1 348 S NMKSSGTVY 0.543 PKG YES
# Ermp1 348 S NMKSSGTVY 0.445 PKC .
# Ermp1 348 S NMKSSGTVY 0.430 CaM-II .
# Ermp1 348 S NMKSSGTVY 0.430 GSK3 .
# Ermp1 348 S NMKSSGTVY 0.408 cdc2 .
# Ermp1 348 S NMKSSGTVY 0.366 CKI .
# Ermp1 348 S NMKSSGTVY 0.351 DNAPK .
# Ermp1 348 S NMKSSGTVY 0.327 CKII .
# Ermp1 348 S NMKSSGTVY 0.300 p38MAPK .
# Ermp1 348 S NMKSSGTVY 0.291 ATM .
# Ermp1 348 S NMKSSGTVY 0.253 RSK .
# Ermp1 348 S NMKSSGTVY 0.145 cdk5 .
# Ermp1 348 S NMKSSGTVY 0.101 PKB .
# Ermp1 348 S NMKSSGTVY 0.089 unsp .
#
# Ermp1 354 S TVYFSVFNS 0.592 unsp YES
# Ermp1 354 S TVYFSVFNS 0.468 cdc2 .
# Ermp1 354 S TVYFSVFNS 0.466 GSK3 .
# Ermp1 354 S TVYFSVFNS 0.446 CaM-II .
# Ermp1 354 S TVYFSVFNS 0.400 PKC .
# Ermp1 354 S TVYFSVFNS 0.386 ATM .
# Ermp1 354 S TVYFSVFNS 0.386 CKI .
# Ermp1 354 S TVYFSVFNS 0.356 CKII .
# Ermp1 354 S TVYFSVFNS 0.347 p38MAPK .
# Ermp1 354 S TVYFSVFNS 0.341 DNAPK .
# Ermp1 354 S TVYFSVFNS 0.278 RSK .
# Ermp1 354 S TVYFSVFNS 0.273 PKG .
# Ermp1 354 S TVYFSVFNS 0.227 cdk5 .
# Ermp1 354 S TVYFSVFNS 0.207 PKA .
# Ermp1 354 S TVYFSVFNS 0.080 PKB .
#
# Ermp1 358 S SVFNSLFFM 0.580 PKA YES
# Ermp1 358 S SVFNSLFFM 0.470 GSK3 .
# Ermp1 358 S SVFNSLFFM 0.449 CaM-II .
# Ermp1 358 S SVFNSLFFM 0.397 cdc2 .
# Ermp1 358 S SVFNSLFFM 0.374 DNAPK .
# Ermp1 358 S SVFNSLFFM 0.367 CKI .
# Ermp1 358 S SVFNSLFFM 0.352 CKII .
# Ermp1 358 S SVFNSLFFM 0.310 ATM .
# Ermp1 358 S SVFNSLFFM 0.296 PKG .
# Ermp1 358 S SVFNSLFFM 0.280 RSK .
# Ermp1 358 S SVFNSLFFM 0.248 p38MAPK .
# Ermp1 358 S SVFNSLFFM 0.200 cdk5 .
# Ermp1 358 S SVFNSLFFM 0.140 PKC .
# Ermp1 358 S SVFNSLFFM 0.078 PKB .
# Ermp1 358 S SVFNSLFFM 0.007 unsp .
#
# Ermp1 364 S FFMYSKLTS 0.480 CKI .
# Ermp1 364 S FFMYSKLTS 0.474 CaM-II .
# Ermp1 364 S FFMYSKLTS 0.445 GSK3 .
# Ermp1 364 S FFMYSKLTS 0.414 cdc2 .
# Ermp1 364 S FFMYSKLTS 0.367 PKC .
# Ermp1 364 S FFMYSKLTS 0.338 DNAPK .
# Ermp1 364 S FFMYSKLTS 0.322 CKII .
# Ermp1 364 S FFMYSKLTS 0.295 PKG .
# Ermp1 364 S FFMYSKLTS 0.284 p38MAPK .
# Ermp1 364 S FFMYSKLTS 0.262 ATM .
# Ermp1 364 S FFMYSKLTS 0.247 RSK .
# Ermp1 364 S FFMYSKLTS 0.194 cdk5 .
# Ermp1 364 S FFMYSKLTS 0.131 PKA .
# Ermp1 364 S FFMYSKLTS 0.082 PKB .
# Ermp1 364 S FFMYSKLTS 0.003 unsp .
#
# Ermp1 368 S SKLTSKILN 0.789 PKC YES
# Ermp1 368 S SKLTSKILN 0.505 PKA YES
# Ermp1 368 S SKLTSKILN 0.445 GSK3 .
# Ermp1 368 S SKLTSKILN 0.434 CaM-II .
# Ermp1 368 S SKLTSKILN 0.364 cdc2 .
# Ermp1 368 S SKLTSKILN 0.362 CKI .
# Ermp1 368 S SKLTSKILN 0.338 DNAPK .
# Ermp1 368 S SKLTSKILN 0.336 p38MAPK .
# Ermp1 368 S SKLTSKILN 0.336 RSK .
# Ermp1 368 S SKLTSKILN 0.334 CKII .
# Ermp1 368 S SKLTSKILN 0.264 ATM .
# Ermp1 368 S SKLTSKILN 0.254 unsp .
# Ermp1 368 S SKLTSKILN 0.252 PKG .
# Ermp1 368 S SKLTSKILN 0.182 cdk5 .
# Ermp1 368 S SKLTSKILN 0.092 PKB .
#
# Ermp1 387 S TLRGSEGSF 0.828 unsp YES
# Ermp1 387 S TLRGSEGSF 0.699 PKA YES
# Ermp1 387 S TLRGSEGSF 0.501 cdc2 YES
# Ermp1 387 S TLRGSEGSF 0.464 GSK3 .
# Ermp1 387 S TLRGSEGSF 0.439 CaM-II .
# Ermp1 387 S TLRGSEGSF 0.438 CKI .
# Ermp1 387 S TLRGSEGSF 0.397 PKC .
# Ermp1 387 S TLRGSEGSF 0.379 DNAPK .
# Ermp1 387 S TLRGSEGSF 0.344 RSK .
# Ermp1 387 S TLRGSEGSF 0.300 p38MAPK .
# Ermp1 387 S TLRGSEGSF 0.292 ATM .
# Ermp1 387 S TLRGSEGSF 0.291 PKG .
# Ermp1 387 S TLRGSEGSF 0.277 CKII .
# Ermp1 387 S TLRGSEGSF 0.164 cdk5 .
# Ermp1 387 S TLRGSEGSF 0.075 PKB .
#
# Ermp1 390 S GSEGSFTVA 0.580 CKI YES
# Ermp1 390 S GSEGSFTVA 0.451 GSK3 .
# Ermp1 390 S GSEGSFTVA 0.449 cdc2 .
# Ermp1 390 S GSEGSFTVA 0.437 CaM-II .
# Ermp1 390 S GSEGSFTVA 0.389 DNAPK .
# Ermp1 390 S GSEGSFTVA 0.354 p38MAPK .
# Ermp1 390 S GSEGSFTVA 0.345 PKC .
# Ermp1 390 S GSEGSFTVA 0.326 CKII .
# Ermp1 390 S GSEGSFTVA 0.304 RSK .
# Ermp1 390 S GSEGSFTVA 0.291 PKG .
# Ermp1 390 S GSEGSFTVA 0.284 ATM .
# Ermp1 390 S GSEGSFTVA 0.204 PKB .
# Ermp1 390 S GSEGSFTVA 0.191 cdk5 .
# Ermp1 390 S GSEGSFTVA 0.188 PKA .
# Ermp1 390 S GSEGSFTVA 0.111 unsp .
#
# Ermp1 401 S AQVISIAGI 0.450 cdc2 .
# Ermp1 401 S AQVISIAGI 0.443 GSK3 .
# Ermp1 401 S AQVISIAGI 0.439 CaM-II .
# Ermp1 401 S AQVISIAGI 0.384 CKI .
# Ermp1 401 S AQVISIAGI 0.352 DNAPK .
# Ermp1 401 S AQVISIAGI 0.330 PKG .
# Ermp1 401 S AQVISIAGI 0.326 CKII .
# Ermp1 401 S AQVISIAGI 0.309 ATM .
# Ermp1 401 S AQVISIAGI 0.299 p38MAPK .
# Ermp1 401 S AQVISIAGI 0.273 RSK .
# Ermp1 401 S AQVISIAGI 0.257 PKA .
# Ermp1 401 S AQVISIAGI 0.135 cdk5 .
# Ermp1 401 S AQVISIAGI 0.076 PKB .
# Ermp1 401 S AQVISIAGI 0.074 PKC .
# Ermp1 401 S AQVISIAGI 0.019 unsp .
#
# Ermp1 425 S DCGMSWFRN 0.619 unsp YES
# Ermp1 425 S DCGMSWFRN 0.530 cdc2 YES
# Ermp1 425 S DCGMSWFRN 0.455 GSK3 .
# Ermp1 425 S DCGMSWFRN 0.444 CaM-II .
# Ermp1 425 S DCGMSWFRN 0.403 CKII .
# Ermp1 425 S DCGMSWFRN 0.384 CKI .
# Ermp1 425 S DCGMSWFRN 0.371 p38MAPK .
# Ermp1 425 S DCGMSWFRN 0.346 DNAPK .
# Ermp1 425 S DCGMSWFRN 0.330 RSK .
# Ermp1 425 S DCGMSWFRN 0.308 PKC .
# Ermp1 425 S DCGMSWFRN 0.297 ATM .
# Ermp1 425 S DCGMSWFRN 0.226 cdk5 .
# Ermp1 425 S DCGMSWFRN 0.201 PKG .
# Ermp1 425 S DCGMSWFRN 0.183 PKA .
# Ermp1 425 S DCGMSWFRN 0.093 PKB .
#
# Ermp1 444 S AIFASLFFT 0.617 PKA YES
# Ermp1 444 S AIFASLFFT 0.471 cdc2 .
# Ermp1 444 S AIFASLFFT 0.461 GSK3 .
# Ermp1 444 S AIFASLFFT 0.426 CaM-II .
# Ermp1 444 S AIFASLFFT 0.367 CKI .
# Ermp1 444 S AIFASLFFT 0.359 DNAPK .
# Ermp1 444 S AIFASLFFT 0.338 ATM .
# Ermp1 444 S AIFASLFFT 0.320 CKII .
# Ermp1 444 S AIFASLFFT 0.292 p38MAPK .
# Ermp1 444 S AIFASLFFT 0.272 PKG .
# Ermp1 444 S AIFASLFFT 0.256 RSK .
# Ermp1 444 S AIFASLFFT 0.154 cdk5 .
# Ermp1 444 S AIFASLFFT 0.109 PKC .
# Ermp1 444 S AIFASLFFT 0.087 PKB .
# Ermp1 444 S AIFASLFFT 0.011 unsp .
#
# Ermp1 450 S FFTESLFKR 0.734 PKC YES
# Ermp1 450 S FFTESLFKR 0.447 CaM-II .
# Ermp1 450 S FFTESLFKR 0.436 GSK3 .
# Ermp1 450 S FFTESLFKR 0.426 CKI .
# Ermp1 450 S FFTESLFKR 0.399 DNAPK .
# Ermp1 450 S FFTESLFKR 0.367 cdc2 .
# Ermp1 450 S FFTESLFKR 0.342 CKII .
# Ermp1 450 S FFTESLFKR 0.309 RSK .
# Ermp1 450 S FFTESLFKR 0.293 ATM .
# Ermp1 450 S FFTESLFKR 0.274 p38MAPK .
# Ermp1 450 S FFTESLFKR 0.247 PKG .
# Ermp1 450 S FFTESLFKR 0.240 cdk5 .
# Ermp1 450 S FFTESLFKR 0.230 PKA .
# Ermp1 450 S FFTESLFKR 0.074 PKB .
# Ermp1 450 S FFTESLFKR 0.003 unsp .
#
# Ermp1 455 S LFKRSEHLA 0.547 PKG YES
# Ermp1 455 S LFKRSEHLA 0.466 PKA .
# Ermp1 455 S LFKRSEHLA 0.436 CaM-II .
# Ermp1 455 S LFKRSEHLA 0.422 cdc2 .
# Ermp1 455 S LFKRSEHLA 0.417 GSK3 .
# Ermp1 455 S LFKRSEHLA 0.411 CKII .
# Ermp1 455 S LFKRSEHLA 0.361 CKI .
# Ermp1 455 S LFKRSEHLA 0.351 p38MAPK .
# Ermp1 455 S LFKRSEHLA 0.341 DNAPK .
# Ermp1 455 S LFKRSEHLA 0.261 ATM .
# Ermp1 455 S LFKRSEHLA 0.259 RSK .
# Ermp1 455 S LFKRSEHLA 0.175 unsp .
# Ermp1 455 S LFKRSEHLA 0.165 cdk5 .
# Ermp1 455 S LFKRSEHLA 0.087 PKC .
# Ermp1 455 S LFKRSEHLA 0.077 PKB .
#
# Ermp1 468 S IFIFSLLTF 0.515 CKI YES
# Ermp1 468 S IFIFSLLTF 0.505 cdc2 YES
# Ermp1 468 S IFIFSLLTF 0.465 CaM-II .
# Ermp1 468 S IFIFSLLTF 0.426 GSK3 .
# Ermp1 468 S IFIFSLLTF 0.404 DNAPK .
# Ermp1 468 S IFIFSLLTF 0.373 PKA .
# Ermp1 468 S IFIFSLLTF 0.349 CKII .
# Ermp1 468 S IFIFSLLTF 0.307 PKG .
# Ermp1 468 S IFIFSLLTF 0.301 PKC .
# Ermp1 468 S IFIFSLLTF 0.280 p38MAPK .
# Ermp1 468 S IFIFSLLTF 0.267 ATM .
# Ermp1 468 S IFIFSLLTF 0.241 RSK .
# Ermp1 468 S IFIFSLLTF 0.200 cdk5 .
# Ermp1 468 S IFIFSLLTF 0.070 PKB .
# Ermp1 468 S IFIFSLLTF 0.004 unsp .
#
# Ermp1 477 S IPLPSAYLF 0.484 PKA .
# Ermp1 477 S IPLPSAYLF 0.450 GSK3 .
# Ermp1 477 S IPLPSAYLF 0.439 CaM-II .
# Ermp1 477 S IPLPSAYLF 0.404 cdc2 .
# Ermp1 477 S IPLPSAYLF 0.388 PKG .
# Ermp1 477 S IPLPSAYLF 0.362 CKI .
# Ermp1 477 S IPLPSAYLF 0.356 CKII .
# Ermp1 477 S IPLPSAYLF 0.351 DNAPK .
# Ermp1 477 S IPLPSAYLF 0.346 p38MAPK .
# Ermp1 477 S IPLPSAYLF 0.293 PKC .
# Ermp1 477 S IPLPSAYLF 0.287 ATM .
# Ermp1 477 S IPLPSAYLF 0.274 RSK .
# Ermp1 477 S IPLPSAYLF 0.177 cdk5 .
# Ermp1 477 S IPLPSAYLF 0.076 PKB .
# Ermp1 477 S IPLPSAYLF 0.010 unsp .
#
# Ermp1 514 S YFIGSIGAM 0.682 PKC YES
# Ermp1 514 S YFIGSIGAM 0.490 PKA .
# Ermp1 514 S YFIGSIGAM 0.449 GSK3 .
# Ermp1 514 S YFIGSIGAM 0.449 CaM-II .
# Ermp1 514 S YFIGSIGAM 0.431 DNAPK .
# Ermp1 514 S YFIGSIGAM 0.409 CKI .
# Ermp1 514 S YFIGSIGAM 0.376 cdc2 .
# Ermp1 514 S YFIGSIGAM 0.356 CKII .
# Ermp1 514 S YFIGSIGAM 0.314 p38MAPK .
# Ermp1 514 S YFIGSIGAM 0.292 ATM .
# Ermp1 514 S YFIGSIGAM 0.226 PKG .
# Ermp1 514 S YFIGSIGAM 0.222 RSK .
# Ermp1 514 S YFIGSIGAM 0.151 cdk5 .
# Ermp1 514 S YFIGSIGAM 0.078 PKB .
# Ermp1 514 S YFIGSIGAM 0.062 unsp .
#
# Ermp1 524 S VGFESAINL 0.635 PKA YES
# Ermp1 524 S VGFESAINL 0.487 CKI .
# Ermp1 524 S VGFESAINL 0.460 CKII .
# Ermp1 524 S VGFESAINL 0.458 CaM-II .
# Ermp1 524 S VGFESAINL 0.445 GSK3 .
# Ermp1 524 S VGFESAINL 0.369 cdc2 .
# Ermp1 524 S VGFESAINL 0.346 DNAPK .
# Ermp1 524 S VGFESAINL 0.345 PKG .
# Ermp1 524 S VGFESAINL 0.313 unsp .
# Ermp1 524 S VGFESAINL 0.306 RSK .
# Ermp1 524 S VGFESAINL 0.293 ATM .
# Ermp1 524 S VGFESAINL 0.290 p38MAPK .
# Ermp1 524 S VGFESAINL 0.162 cdk5 .
# Ermp1 524 S VGFESAINL 0.074 PKB .
# Ermp1 524 S VGFESAINL 0.074 PKC .
#
# Ermp1 565 S FPLMSPWIQ 0.644 cdk5 YES
# Ermp1 565 S FPLMSPWIQ 0.496 GSK3 .
# Ermp1 565 S FPLMSPWIQ 0.471 p38MAPK .
# Ermp1 565 S FPLMSPWIQ 0.445 CaM-II .
# Ermp1 565 S FPLMSPWIQ 0.366 cdc2 .
# Ermp1 565 S FPLMSPWIQ 0.362 CKI .
# Ermp1 565 S FPLMSPWIQ 0.352 DNAPK .
# Ermp1 565 S FPLMSPWIQ 0.349 RSK .
# Ermp1 565 S FPLMSPWIQ 0.303 PKG .
# Ermp1 565 S FPLMSPWIQ 0.265 ATM .
# Ermp1 565 S FPLMSPWIQ 0.243 CKII .
# Ermp1 565 S FPLMSPWIQ 0.196 PKA .
# Ermp1 565 S FPLMSPWIQ 0.089 PKB .
# Ermp1 565 S FPLMSPWIQ 0.050 PKC .
# Ermp1 565 S FPLMSPWIQ 0.036 unsp .
#
# Ermp1 573 S QRFRSRCCF 0.983 unsp YES
# Ermp1 573 S QRFRSRCCF 0.695 PKA YES
# Ermp1 573 S QRFRSRCCF 0.590 PKG YES
# Ermp1 573 S QRFRSRCCF 0.461 CaM-II .
# Ermp1 573 S QRFRSRCCF 0.461 cdc2 .
# Ermp1 573 S QRFRSRCCF 0.452 GSK3 .
# Ermp1 573 S QRFRSRCCF 0.431 RSK .
# Ermp1 573 S QRFRSRCCF 0.360 CKI .
# Ermp1 573 S QRFRSRCCF 0.344 DNAPK .
# Ermp1 573 S QRFRSRCCF 0.299 p38MAPK .
# Ermp1 573 S QRFRSRCCF 0.270 ATM .
# Ermp1 573 S QRFRSRCCF 0.233 CKII .
# Ermp1 573 S QRFRSRCCF 0.196 cdk5 .
# Ermp1 573 S QRFRSRCCF 0.165 PKB .
# Ermp1 573 S QRFRSRCCF 0.126 PKC .
#
# Ermp1 584 S GLLFSIFVV 0.509 cdc2 YES
# Ermp1 584 S GLLFSIFVV 0.456 CaM-II .
# Ermp1 584 S GLLFSIFVV 0.433 GSK3 .
# Ermp1 584 S GLLFSIFVV 0.429 CKI .
# Ermp1 584 S GLLFSIFVV 0.367 PKC .
# Ermp1 584 S GLLFSIFVV 0.341 DNAPK .
# Ermp1 584 S GLLFSIFVV 0.335 p38MAPK .
# Ermp1 584 S GLLFSIFVV 0.312 ATM .
# Ermp1 584 S GLLFSIFVV 0.286 RSK .
# Ermp1 584 S GLLFSIFVV 0.254 PKG .
# Ermp1 584 S GLLFSIFVV 0.251 CKII .
# Ermp1 584 S GLLFSIFVV 0.239 PKA .
# Ermp1 584 S GLLFSIFVV 0.181 cdk5 .
# Ermp1 584 S GLLFSIFVV 0.077 PKB .
# Ermp1 584 S GLLFSIFVV 0.002 unsp .
#
# Ermp1 591 S VVGFSSFIL 0.442 GSK3 .
# Ermp1 591 S VVGFSSFIL 0.440 CaM-II .
# Ermp1 591 S VVGFSSFIL 0.392 cdc2 .
# Ermp1 591 S VVGFSSFIL 0.388 CKI .
# Ermp1 591 S VVGFSSFIL 0.385 PKA .
# Ermp1 591 S VVGFSSFIL 0.350 CKII .
# Ermp1 591 S VVGFSSFIL 0.341 DNAPK .
# Ermp1 591 S VVGFSSFIL 0.325 RSK .
# Ermp1 591 S VVGFSSFIL 0.300 p38MAPK .
# Ermp1 591 S VVGFSSFIL 0.288 PKG .
# Ermp1 591 S VVGFSSFIL 0.285 ATM .
# Ermp1 591 S VVGFSSFIL 0.156 cdk5 .
# Ermp1 591 S VVGFSSFIL 0.087 PKC .
# Ermp1 591 S VVGFSSFIL 0.080 PKB .
# Ermp1 591 S VVGFSSFIL 0.009 unsp .
#
# Ermp1 592 S VGFSSFILA 0.541 PKC YES
# Ermp1 592 S VGFSSFILA 0.444 cdc2 .
# Ermp1 592 S VGFSSFILA 0.438 CaM-II .
# Ermp1 592 S VGFSSFILA 0.433 GSK3 .
# Ermp1 592 S VGFSSFILA 0.382 CKII .
# Ermp1 592 S VGFSSFILA 0.373 CKI .
# Ermp1 592 S VGFSSFILA 0.346 DNAPK .
# Ermp1 592 S VGFSSFILA 0.339 p38MAPK .
# Ermp1 592 S VGFSSFILA 0.296 ATM .
# Ermp1 592 S VGFSSFILA 0.286 PKG .
# Ermp1 592 S VGFSSFILA 0.272 RSK .
# Ermp1 592 S VGFSSFILA 0.213 PKA .
# Ermp1 592 S VGFSSFILA 0.174 cdk5 .
# Ermp1 592 S VGFSSFILA 0.086 PKB .
# Ermp1 592 S VGFSSFILA 0.010 unsp .
#
# Ermp1 604 S TYYDSLHPR 0.462 GSK3 .
# Ermp1 604 S TYYDSLHPR 0.426 CaM-II .
# Ermp1 604 S TYYDSLHPR 0.391 CKII .
# Ermp1 604 S TYYDSLHPR 0.391 PKG .
# Ermp1 604 S TYYDSLHPR 0.361 CKI .
# Ermp1 604 S TYYDSLHPR 0.355 DNAPK .
# Ermp1 604 S TYYDSLHPR 0.354 cdc2 .
# Ermp1 604 S TYYDSLHPR 0.297 ATM .
# Ermp1 604 S TYYDSLHPR 0.281 p38MAPK .
# Ermp1 604 S TYYDSLHPR 0.239 PKC .
# Ermp1 604 S TYYDSLHPR 0.233 RSK .
# Ermp1 604 S TYYDSLHPR 0.191 cdk5 .
# Ermp1 604 S TYYDSLHPR 0.171 PKA .
# Ermp1 604 S TYYDSLHPR 0.073 PKB .
# Ermp1 604 S TYYDSLHPR 0.037 unsp .
#
# Ermp1 620 S ENITSNEVS 0.476 GSK3 .
# Ermp1 620 S ENITSNEVS 0.460 CaM-II .
# Ermp1 620 S ENITSNEVS 0.428 CKII .
# Ermp1 620 S ENITSNEVS 0.413 cdc2 .
# Ermp1 620 S ENITSNEVS 0.384 DNAPK .
# Ermp1 620 S ENITSNEVS 0.372 p38MAPK .
# Ermp1 620 S ENITSNEVS 0.372 CKI .
# Ermp1 620 S ENITSNEVS 0.315 ATM .
# Ermp1 620 S ENITSNEVS 0.306 RSK .
# Ermp1 620 S ENITSNEVS 0.278 PKG .
# Ermp1 620 S ENITSNEVS 0.255 unsp .
# Ermp1 620 S ENITSNEVS 0.167 cdk5 .
# Ermp1 620 S ENITSNEVS 0.110 PKA .
# Ermp1 620 S ENITSNEVS 0.104 PKB .
# Ermp1 620 S ENITSNEVS 0.102 PKC .
#
# Ermp1 624 S SNEVSLHIA 0.455 GSK3 .
# Ermp1 624 S SNEVSLHIA 0.452 cdc2 .
# Ermp1 624 S SNEVSLHIA 0.434 CaM-II .
# Ermp1 624 S SNEVSLHIA 0.399 CKI .
# Ermp1 624 S SNEVSLHIA 0.366 DNAPK .
# Ermp1 624 S SNEVSLHIA 0.346 CKII .
# Ermp1 624 S SNEVSLHIA 0.302 RSK .
# Ermp1 624 S SNEVSLHIA 0.282 PKG .
# Ermp1 624 S SNEVSLHIA 0.255 ATM .
# Ermp1 624 S SNEVSLHIA 0.244 cdk5 .
# Ermp1 624 S SNEVSLHIA 0.231 PKA .
# Ermp1 624 S SNEVSLHIA 0.206 p38MAPK .
# Ermp1 624 S SNEVSLHIA 0.144 unsp .
# Ermp1 624 S SNEVSLHIA 0.118 PKC .
# Ermp1 624 S SNEVSLHIA 0.083 PKB .
#
# Ermp1 629 S LHIASADSA 0.467 CaM-II .
# Ermp1 629 S LHIASADSA 0.455 GSK3 .
# Ermp1 629 S LHIASADSA 0.441 cdc2 .
# Ermp1 629 S LHIASADSA 0.405 DNAPK .
# Ermp1 629 S LHIASADSA 0.377 CKI .
# Ermp1 629 S LHIASADSA 0.376 p38MAPK .
# Ermp1 629 S LHIASADSA 0.354 CKII .
# Ermp1 629 S LHIASADSA 0.348 PKG .
# Ermp1 629 S LHIASADSA 0.292 ATM .
# Ermp1 629 S LHIASADSA 0.291 RSK .
# Ermp1 629 S LHIASADSA 0.269 PKA .
# Ermp1 629 S LHIASADSA 0.199 cdk5 .
# Ermp1 629 S LHIASADSA 0.121 PKC .
# Ermp1 629 S LHIASADSA 0.104 unsp .
# Ermp1 629 S LHIASADSA 0.085 PKB .
#
# Ermp1 632 S ASADSAPGF 0.910 unsp YES
# Ermp1 632 S ASADSAPGF 0.557 cdc2 YES
# Ermp1 632 S ASADSAPGF 0.533 CKI YES
# Ermp1 632 S ASADSAPGF 0.464 GSK3 .
# Ermp1 632 S ASADSAPGF 0.448 CaM-II .
# Ermp1 632 S ASADSAPGF 0.352 CKII .
# Ermp1 632 S ASADSAPGF 0.347 DNAPK .
# Ermp1 632 S ASADSAPGF 0.318 PKG .
# Ermp1 632 S ASADSAPGF 0.279 p38MAPK .
# Ermp1 632 S ASADSAPGF 0.277 ATM .
# Ermp1 632 S ASADSAPGF 0.253 RSK .
# Ermp1 632 S ASADSAPGF 0.200 cdk5 .
# Ermp1 632 S ASADSAPGF 0.119 PKA .
# Ermp1 632 S ASADSAPGF 0.086 PKB .
# Ermp1 632 S ASADSAPGF 0.086 PKC .
#
# Ermp1 640 S FDKLSSDLS 0.534 CKII YES
# Ermp1 640 S FDKLSSDLS 0.449 cdc2 .
# Ermp1 640 S FDKLSSDLS 0.444 GSK3 .
# Ermp1 640 S FDKLSSDLS 0.415 CaM-II .
# Ermp1 640 S FDKLSSDLS 0.371 CKI .
# Ermp1 640 S FDKLSSDLS 0.370 PKA .
# Ermp1 640 S FDKLSSDLS 0.364 PKG .
# Ermp1 640 S FDKLSSDLS 0.346 DNAPK .
# Ermp1 640 S FDKLSSDLS 0.330 ATM .
# Ermp1 640 S FDKLSSDLS 0.326 p38MAPK .
# Ermp1 640 S FDKLSSDLS 0.321 RSK .
# Ermp1 640 S FDKLSSDLS 0.303 PKC .
# Ermp1 640 S FDKLSSDLS 0.158 cdk5 .
# Ermp1 640 S FDKLSSDLS 0.087 PKB .
# Ermp1 640 S FDKLSSDLS 0.065 unsp .
#
# Ermp1 641 S DKLSSDLSS 0.459 CaM-II .
# Ermp1 641 S DKLSSDLSS 0.436 GSK3 .
# Ermp1 641 S DKLSSDLSS 0.422 PKC .
# Ermp1 641 S DKLSSDLSS 0.407 cdc2 .
# Ermp1 641 S DKLSSDLSS 0.387 p38MAPK .
# Ermp1 641 S DKLSSDLSS 0.378 CKII .
# Ermp1 641 S DKLSSDLSS 0.365 CKI .
# Ermp1 641 S DKLSSDLSS 0.356 RSK .
# Ermp1 641 S DKLSSDLSS 0.340 DNAPK .
# Ermp1 641 S DKLSSDLSS 0.279 unsp .
# Ermp1 641 S DKLSSDLSS 0.269 PKA .
# Ermp1 641 S DKLSSDLSS 0.259 ATM .
# Ermp1 641 S DKLSSDLSS 0.237 PKG .
# Ermp1 641 S DKLSSDLSS 0.181 cdk5 .
# Ermp1 641 S DKLSSDLSS 0.102 PKB .
#
# Ermp1 644 S SSDLSSLLT 0.470 CKII .
# Ermp1 644 S SSDLSSLLT 0.449 GSK3 .
# Ermp1 644 S SSDLSSLLT 0.447 CaM-II .
# Ermp1 644 S SSDLSSLLT 0.411 CKI .
# Ermp1 644 S SSDLSSLLT 0.382 cdc2 .
# Ermp1 644 S SSDLSSLLT 0.373 unsp .
# Ermp1 644 S SSDLSSLLT 0.350 DNAPK .
# Ermp1 644 S SSDLSSLLT 0.317 ATM .
# Ermp1 644 S SSDLSSLLT 0.303 p38MAPK .
# Ermp1 644 S SSDLSSLLT 0.278 RSK .
# Ermp1 644 S SSDLSSLLT 0.248 PKG .
# Ermp1 644 S SSDLSSLLT 0.225 PKA .
# Ermp1 644 S SSDLSSLLT 0.174 cdk5 .
# Ermp1 644 S SSDLSSLLT 0.151 PKC .
# Ermp1 644 S SSDLSSLLT 0.079 PKB .
#
# Ermp1 645 S SDLSSLLTD 0.484 CKII .
# Ermp1 645 S SDLSSLLTD 0.452 CaM-II .
# Ermp1 645 S SDLSSLLTD 0.436 CKI .
# Ermp1 645 S SDLSSLLTD 0.434 GSK3 .
# Ermp1 645 S SDLSSLLTD 0.421 cdc2 .
# Ermp1 645 S SDLSSLLTD 0.361 DNAPK .
# Ermp1 645 S SDLSSLLTD 0.316 RSK .
# Ermp1 645 S SDLSSLLTD 0.271 ATM .
# Ermp1 645 S SDLSSLLTD 0.269 p38MAPK .
# Ermp1 645 S SDLSSLLTD 0.240 PKC .
# Ermp1 645 S SDLSSLLTD 0.231 PKA .
# Ermp1 645 S SDLSSLLTD 0.203 PKG .
# Ermp1 645 S SDLSSLLTD 0.182 cdk5 .
# Ermp1 645 S SDLSSLLTD 0.174 unsp .
# Ermp1 645 S SDLSSLLTD 0.079 PKB .
#
# Ermp1 662 S DDWNSDWDT 0.963 unsp YES
# Ermp1 662 S DDWNSDWDT 0.573 CKII YES
# Ermp1 662 S DDWNSDWDT 0.444 cdc2 .
# Ermp1 662 S DDWNSDWDT 0.439 GSK3 .
# Ermp1 662 S DDWNSDWDT 0.437 CaM-II .
# Ermp1 662 S DDWNSDWDT 0.431 DNAPK .
# Ermp1 662 S DDWNSDWDT 0.393 CKI .
# Ermp1 662 S DDWNSDWDT 0.344 ATM .
# Ermp1 662 S DDWNSDWDT 0.269 RSK .
# Ermp1 662 S DDWNSDWDT 0.250 p38MAPK .
# Ermp1 662 S DDWNSDWDT 0.248 PKA .
# Ermp1 662 S DDWNSDWDT 0.243 PKG .
# Ermp1 662 S DDWNSDWDT 0.173 cdk5 .
# Ermp1 662 S DDWNSDWDT 0.127 PKC .
# Ermp1 662 S DDWNSDWDT 0.105 PKB .
#
# Ermp1 671 S VYPFSQFLG 0.611 ATM YES
# Ermp1 671 S VYPFSQFLG 0.474 DNAPK .
# Ermp1 671 S VYPFSQFLG 0.452 GSK3 .
# Ermp1 671 S VYPFSQFLG 0.440 cdc2 .
# Ermp1 671 S VYPFSQFLG 0.414 CaM-II .
# Ermp1 671 S VYPFSQFLG 0.404 CKI .
# Ermp1 671 S VYPFSQFLG 0.400 CKII .
# Ermp1 671 S VYPFSQFLG 0.370 p38MAPK .
# Ermp1 671 S VYPFSQFLG 0.235 RSK .
# Ermp1 671 S VYPFSQFLG 0.226 PKG .
# Ermp1 671 S VYPFSQFLG 0.197 cdk5 .
# Ermp1 671 S VYPFSQFLG 0.189 PKC .
# Ermp1 671 S VYPFSQFLG 0.184 PKA .
# Ermp1 671 S VYPFSQFLG 0.088 PKB .
# Ermp1 671 S VYPFSQFLG 0.036 unsp .
#
# Ermp1 676 S QFLGSYRIP 0.850 PKC YES
# Ermp1 676 S QFLGSYRIP 0.500 cdc2 YES
# Ermp1 676 S QFLGSYRIP 0.474 p38MAPK .
# Ermp1 676 S QFLGSYRIP 0.442 GSK3 .
# Ermp1 676 S QFLGSYRIP 0.440 CaM-II .
# Ermp1 676 S QFLGSYRIP 0.369 CKI .
# Ermp1 676 S QFLGSYRIP 0.368 DNAPK .
# Ermp1 676 S QFLGSYRIP 0.352 RSK .
# Ermp1 676 S QFLGSYRIP 0.332 unsp .
# Ermp1 676 S QFLGSYRIP 0.300 ATM .
# Ermp1 676 S QFLGSYRIP 0.281 CKII .
# Ermp1 676 S QFLGSYRIP 0.253 PKG .
# Ermp1 676 S QFLGSYRIP 0.200 cdk5 .
# Ermp1 676 S QFLGSYRIP 0.180 PKA .
# Ermp1 676 S QFLGSYRIP 0.091 PKB .
#
# Ermp1 692 S TTLPSIKFS 0.747 PKC YES
# Ermp1 692 S TTLPSIKFS 0.450 GSK3 .
# Ermp1 692 S TTLPSIKFS 0.441 CaM-II .
# Ermp1 692 S TTLPSIKFS 0.379 CKI .
# Ermp1 692 S TTLPSIKFS 0.364 PKG .
# Ermp1 692 S TTLPSIKFS 0.357 cdc2 .
# Ermp1 692 S TTLPSIKFS 0.341 DNAPK .
# Ermp1 692 S TTLPSIKFS 0.332 p38MAPK .
# Ermp1 692 S TTLPSIKFS 0.301 ATM .
# Ermp1 692 S TTLPSIKFS 0.283 RSK .
# Ermp1 692 S TTLPSIKFS 0.282 CKII .
# Ermp1 692 S TTLPSIKFS 0.211 unsp .
# Ermp1 692 S TTLPSIKFS 0.168 cdk5 .
# Ermp1 692 S TTLPSIKFS 0.114 PKA .
# Ermp1 692 S TTLPSIKFS 0.098 PKB .
#
# Ermp1 696 S SIKFSNKVV 0.866 PKC YES
# Ermp1 696 S SIKFSNKVV 0.540 PKG YES
# Ermp1 696 S SIKFSNKVV 0.519 unsp YES
# Ermp1 696 S SIKFSNKVV 0.465 GSK3 .
# Ermp1 696 S SIKFSNKVV 0.436 CaM-II .
# Ermp1 696 S SIKFSNKVV 0.421 cdc2 .
# Ermp1 696 S SIKFSNKVV 0.370 CKI .
# Ermp1 696 S SIKFSNKVV 0.342 DNAPK .
# Ermp1 696 S SIKFSNKVV 0.292 p38MAPK .
# Ermp1 696 S SIKFSNKVV 0.289 RSK .
# Ermp1 696 S SIKFSNKVV 0.289 ATM .
# Ermp1 696 S SIKFSNKVV 0.283 CKII .
# Ermp1 696 S SIKFSNKVV 0.281 PKA .
# Ermp1 696 S SIKFSNKVV 0.176 cdk5 .
# Ermp1 696 S SIKFSNKVV 0.087 PKB .
#
# Ermp1 722 S WTVVSFDAD 0.452 CKII .
# Ermp1 722 S WTVVSFDAD 0.440 CaM-II .
# Ermp1 722 S WTVVSFDAD 0.424 GSK3 .
# Ermp1 722 S WTVVSFDAD 0.398 cdc2 .
# Ermp1 722 S WTVVSFDAD 0.376 CKI .
# Ermp1 722 S WTVVSFDAD 0.349 DNAPK .
# Ermp1 722 S WTVVSFDAD 0.320 p38MAPK .
# Ermp1 722 S WTVVSFDAD 0.310 RSK .
# Ermp1 722 S WTVVSFDAD 0.291 ATM .
# Ermp1 722 S WTVVSFDAD 0.287 PKC .
# Ermp1 722 S WTVVSFDAD 0.261 PKG .
# Ermp1 722 S WTVVSFDAD 0.229 PKA .
# Ermp1 722 S WTVVSFDAD 0.177 cdk5 .
# Ermp1 722 S WTVVSFDAD 0.096 PKB .
# Ermp1 722 S WTVVSFDAD 0.048 unsp .
#
# Ermp1 729 S ADVLSWSLP 0.666 unsp YES
# Ermp1 729 S ADVLSWSLP 0.543 CKII YES
# Ermp1 729 S ADVLSWSLP 0.458 cdc2 .
# Ermp1 729 S ADVLSWSLP 0.453 GSK3 .
# Ermp1 729 S ADVLSWSLP 0.430 CaM-II .
# Ermp1 729 S ADVLSWSLP 0.381 CKI .
# Ermp1 729 S ADVLSWSLP 0.378 p38MAPK .
# Ermp1 729 S ADVLSWSLP 0.367 DNAPK .
# Ermp1 729 S ADVLSWSLP 0.359 ATM .
# Ermp1 729 S ADVLSWSLP 0.291 RSK .
# Ermp1 729 S ADVLSWSLP 0.257 PKG .
# Ermp1 729 S ADVLSWSLP 0.255 PKA .
# Ermp1 729 S ADVLSWSLP 0.207 cdk5 .
# Ermp1 729 S ADVLSWSLP 0.140 PKC .
# Ermp1 729 S ADVLSWSLP 0.091 PKB .
#
# Ermp1 731 S VLSWSLPEV 0.495 CKII .
# Ermp1 731 S VLSWSLPEV 0.490 CKI .
# Ermp1 731 S VLSWSLPEV 0.469 GSK3 .
# Ermp1 731 S VLSWSLPEV 0.457 DNAPK .
# Ermp1 731 S VLSWSLPEV 0.431 CaM-II .
# Ermp1 731 S VLSWSLPEV 0.412 cdc2 .
# Ermp1 731 S VLSWSLPEV 0.327 PKA .
# Ermp1 731 S VLSWSLPEV 0.311 PKG .
# Ermp1 731 S VLSWSLPEV 0.282 p38MAPK .
# Ermp1 731 S VLSWSLPEV 0.281 RSK .
# Ermp1 731 S VLSWSLPEV 0.279 ATM .
# Ermp1 731 S VLSWSLPEV 0.197 unsp .
# Ermp1 731 S VLSWSLPEV 0.186 PKC .
# Ermp1 731 S VLSWSLPEV 0.159 cdk5 .
# Ermp1 731 S VLSWSLPEV 0.080 PKB .
#
# Ermp1 737 S PEVPSTVRR 0.497 cdc2 .
# Ermp1 737 S PEVPSTVRR 0.478 GSK3 .
# Ermp1 737 S PEVPSTVRR 0.420 CaM-II .
# Ermp1 737 S PEVPSTVRR 0.360 CKI .
# Ermp1 737 S PEVPSTVRR 0.344 DNAPK .
# Ermp1 737 S PEVPSTVRR 0.297 CKII .
# Ermp1 737 S PEVPSTVRR 0.284 p38MAPK .
# Ermp1 737 S PEVPSTVRR 0.283 PKC .
# Ermp1 737 S PEVPSTVRR 0.279 PKG .
# Ermp1 737 S PEVPSTVRR 0.267 ATM .
# Ermp1 737 S PEVPSTVRR 0.240 cdk5 .
# Ermp1 737 S PEVPSTVRR 0.224 RSK .
# Ermp1 737 S PEVPSTVRR 0.105 PKA .
# Ermp1 737 S PEVPSTVRR 0.077 PKB .
# Ermp1 737 S PEVPSTVRR 0.038 unsp .
#
# Ermp1 748 S VREVSAYGL 0.922 unsp YES
# Ermp1 748 S VREVSAYGL 0.651 PKA YES
# Ermp1 748 S VREVSAYGL 0.474 CaM-II .
# Ermp1 748 S VREVSAYGL 0.450 GSK3 .
# Ermp1 748 S VREVSAYGL 0.418 PKG .
# Ermp1 748 S VREVSAYGL 0.409 cdc2 .
# Ermp1 748 S VREVSAYGL 0.398 RSK .
# Ermp1 748 S VREVSAYGL 0.395 CKI .
# Ermp1 748 S VREVSAYGL 0.363 DNAPK .
# Ermp1 748 S VREVSAYGL 0.267 CKII .
# Ermp1 748 S VREVSAYGL 0.262 p38MAPK .
# Ermp1 748 S VREVSAYGL 0.258 ATM .
# Ermp1 748 S VREVSAYGL 0.193 PKB .
# Ermp1 748 S VREVSAYGL 0.193 cdk5 .
# Ermp1 748 S VREVSAYGL 0.048 PKC .
#
# Ermp1 754 S YGLDSYSFN 0.531 PKC YES
# Ermp1 754 S YGLDSYSFN 0.515 unsp YES
# Ermp1 754 S YGLDSYSFN 0.454 GSK3 .
# Ermp1 754 S YGLDSYSFN 0.437 CaM-II .
# Ermp1 754 S YGLDSYSFN 0.418 RSK .
# Ermp1 754 S YGLDSYSFN 0.412 cdc2 .
# Ermp1 754 S YGLDSYSFN 0.365 CKII .
# Ermp1 754 S YGLDSYSFN 0.365 CKI .
# Ermp1 754 S YGLDSYSFN 0.358 DNAPK .
# Ermp1 754 S YGLDSYSFN 0.283 p38MAPK .
# Ermp1 754 S YGLDSYSFN 0.274 ATM .
# Ermp1 754 S YGLDSYSFN 0.266 PKG .
# Ermp1 754 S YGLDSYSFN 0.149 cdk5 .
# Ermp1 754 S YGLDSYSFN 0.146 PKA .
# Ermp1 754 S YGLDSYSFN 0.099 PKB .
#
# Ermp1 756 S LDSYSFNMS 0.486 cdc2 .
# Ermp1 756 S LDSYSFNMS 0.444 GSK3 .
# Ermp1 756 S LDSYSFNMS 0.437 CaM-II .
# Ermp1 756 S LDSYSFNMS 0.418 CKII .
# Ermp1 756 S LDSYSFNMS 0.383 CKI .
# Ermp1 756 S LDSYSFNMS 0.349 DNAPK .
# Ermp1 756 S LDSYSFNMS 0.328 ATM .
# Ermp1 756 S LDSYSFNMS 0.321 PKG .
# Ermp1 756 S LDSYSFNMS 0.253 p38MAPK .
# Ermp1 756 S LDSYSFNMS 0.230 RSK .
# Ermp1 756 S LDSYSFNMS 0.172 cdk5 .
# Ermp1 756 S LDSYSFNMS 0.169 PKA .
# Ermp1 756 S LDSYSFNMS 0.097 PKC .
# Ermp1 756 S LDSYSFNMS 0.087 PKB .
# Ermp1 756 S LDSYSFNMS 0.044 unsp .
#
# Ermp1 760 S SFNMSYLEA 0.936 unsp YES
# Ermp1 760 S SFNMSYLEA 0.597 CKII YES
# Ermp1 760 S SFNMSYLEA 0.453 GSK3 .
# Ermp1 760 S SFNMSYLEA 0.443 CaM-II .
# Ermp1 760 S SFNMSYLEA 0.424 cdc2 .
# Ermp1 760 S SFNMSYLEA 0.423 DNAPK .
# Ermp1 760 S SFNMSYLEA 0.387 CKI .
# Ermp1 760 S SFNMSYLEA 0.380 PKG .
# Ermp1 760 S SFNMSYLEA 0.333 RSK .
# Ermp1 760 S SFNMSYLEA 0.313 p38MAPK .
# Ermp1 760 S SFNMSYLEA 0.292 PKC .
# Ermp1 760 S SFNMSYLEA 0.265 ATM .
# Ermp1 760 S SFNMSYLEA 0.207 cdk5 .
# Ermp1 760 S SFNMSYLEA 0.157 PKA .
# Ermp1 760 S SFNMSYLEA 0.085 PKB .
#
# Ermp1 781 S GHYPSKASE 0.457 GSK3 .
# Ermp1 781 S GHYPSKASE 0.451 CaM-II .
# Ermp1 781 S GHYPSKASE 0.409 PKG .
# Ermp1 781 S GHYPSKASE 0.388 cdc2 .
# Ermp1 781 S GHYPSKASE 0.361 CKI .
# Ermp1 781 S GHYPSKASE 0.354 DNAPK .
# Ermp1 781 S GHYPSKASE 0.319 CKII .
# Ermp1 781 S GHYPSKASE 0.305 PKC .
# Ermp1 781 S GHYPSKASE 0.301 p38MAPK .
# Ermp1 781 S GHYPSKASE 0.267 PKA .
# Ermp1 781 S GHYPSKASE 0.266 RSK .
# Ermp1 781 S GHYPSKASE 0.262 ATM .
# Ermp1 781 S GHYPSKASE 0.223 cdk5 .
# Ermp1 781 S GHYPSKASE 0.086 PKB .
# Ermp1 781 S GHYPSKASE 0.017 unsp .
#
# Ermp1 784 S PSKASEGRD 0.978 unsp YES
# Ermp1 784 S PSKASEGRD 0.477 cdc2 .
# Ermp1 784 S PSKASEGRD 0.434 GSK3 .
# Ermp1 784 S PSKASEGRD 0.416 CaM-II .
# Ermp1 784 S PSKASEGRD 0.391 p38MAPK .
# Ermp1 784 S PSKASEGRD 0.357 CKI .
# Ermp1 784 S PSKASEGRD 0.343 DNAPK .
# Ermp1 784 S PSKASEGRD 0.318 CKII .
# Ermp1 784 S PSKASEGRD 0.306 RSK .
# Ermp1 784 S PSKASEGRD 0.281 PKC .
# Ermp1 784 S PSKASEGRD 0.266 ATM .
# Ermp1 784 S PSKASEGRD 0.258 PKG .
# Ermp1 784 S PSKASEGRD 0.251 cdk5 .
# Ermp1 784 S PSKASEGRD 0.228 PKA .
# Ermp1 784 S PSKASEGRD 0.092 PKB .
#
# Ermp1 791 S RDRASIQLC 0.683 PKA YES
# Ermp1 791 S RDRASIQLC 0.483 unsp .
# Ermp1 791 S RDRASIQLC 0.459 cdc2 .
# Ermp1 791 S RDRASIQLC 0.443 CaM-II .
# Ermp1 791 S RDRASIQLC 0.433 GSK3 .
# Ermp1 791 S RDRASIQLC 0.405 CKII .
# Ermp1 791 S RDRASIQLC 0.375 DNAPK .
# Ermp1 791 S RDRASIQLC 0.369 CKI .
# Ermp1 791 S RDRASIQLC 0.319 RSK .
# Ermp1 791 S RDRASIQLC 0.313 p38MAPK .
# Ermp1 791 S RDRASIQLC 0.290 ATM .
# Ermp1 791 S RDRASIQLC 0.232 PKG .
# Ermp1 791 S RDRASIQLC 0.193 cdk5 .
# Ermp1 791 S RDRASIQLC 0.134 PKC .
# Ermp1 791 S RDRASIQLC 0.094 PKB .
#
# Ermp1 816 S IGVVSGNFK 0.457 CKII .
# Ermp1 816 S IGVVSGNFK 0.448 CaM-II .
# Ermp1 816 S IGVVSGNFK 0.444 GSK3 .
# Ermp1 816 S IGVVSGNFK 0.422 cdc2 .
# Ermp1 816 S IGVVSGNFK 0.368 CKI .
# Ermp1 816 S IGVVSGNFK 0.352 PKC .
# Ermp1 816 S IGVVSGNFK 0.349 DNAPK .
# Ermp1 816 S IGVVSGNFK 0.311 ATM .
# Ermp1 816 S IGVVSGNFK 0.298 p38MAPK .
# Ermp1 816 S IGVVSGNFK 0.271 RSK .
# Ermp1 816 S IGVVSGNFK 0.266 PKG .
# Ermp1 816 S IGVVSGNFK 0.169 PKA .
# Ermp1 816 S IGVVSGNFK 0.163 cdk5 .
# Ermp1 816 S IGVVSGNFK 0.091 PKB .
# Ermp1 816 S IGVVSGNFK 0.005 unsp .
#
MVLVCASSSKCKRNTFLQLAMVLFAVVMARIALYFHNHLDEPLVDPYDAN # 50
GNPQFSEANALKHVIHLSDDIGYRILGTIEQERAREYIMNEVLALQKQLQ # 100
DGPNADIHQMEVSLESGDGAHRFDFMNKYVIKKYQNLKNIVVRLSNGTEA # 150
CKEEAVLINAHVDSTLPSPGATDDALAVAILLEAIRIFISRPVPLTHSIV # 200
FLFNDAEESLQDASHMFITQSPLRDTIKCVVNLEACGTTGSEILFQATSN # 250
EMIKAYSHVPHPFGTVLADDVFRTGLILSDTDFRQFVQYGNLTGLDMAVV # 300
KNSYLYHTKKDLAPYISPGTPQNFGENILAILTYLVSPEADLNNMKSSGT # 350
VYFSVFNSLFFMYSKLTSKILNTLVGGLGILLTLRGSEGSFTVALIAQVI # 400
SIAGIFVIPNIWAYILGNVLDCGMSWFRNEYWPLFIYLPAIFASLFFTES # 450
LFKRSEHLALRATIFIFSLLTFIPLPSAYLFTIIDFFMVFALFLNDKILA # 500
KPGTVHPLTYFIGSIGAMTVGFESAINLLEIFVPLTGRIGTDKVADNVVA # 550
TVCVCGFNIYFPLMSPWIQRFRSRCCFRLGLLFSIFVVGFSSFILAKQDT # 600
YYDSLHPRRIFVQRMENITSNEVSLHIASADSAPGFDKLSSDLSSLLTDE # 650
PVVKTEMDDWNSDWDTVYPFSQFLGSYRIPLNDTVDVTTLPSIKFSNKVV # 700
KDNVVNVTVTVEHPGLIWTVVSFDADVLSWSLPEVPSTVRRHHVREVSAY # 750
GLDSYSFNMSYLEAPIYFDFVGVDGVGHYPSKASEGRDRASIQLCEKLTN # 800
DYLPDWTDTLCIGVVSGNFKLE # 850
%1 ......SSS......................................... # 50
%1 .....S...........S................................ # 100
%1 ............S..S............................S..... # 150
%1 .................S.....................S.......... # 200
%1 ........S....S......S...................S.......S. # 250
%1 ......S.....................S..................... # 300
%1 ..S.............S..............................S.. # 350
%1 ...S...S.........S..................S..S.......... # 400
%1 ........................S..................S.....S # 450
%1 ....S............S................................ # 500
%1 .............S.........S.......................... # 550
%1 ..............S.......S..........S.......S........ # 600
%1 ...............................S.......S.......... # 650
%1 ...........S........S....S...............S...S.... # 700
%1 ............................S..................S.. # 750
%1 ...S.....S.......................S......S......... # 800
%1 ......................
